# Supplementary material for: Optimized cytogenetic risk-group stratification of KMT2A-rearranged pediatric acute myeloid leukemia
Source: PubMed Central journal article supplement — Blood Adv. 2024 Apr 16;8(12):3200–13. doi: 10.1182/bloodadvances.2023011771 (PMC11225675; doi:10.1182/bloodadvances.2023011771), 2024-04-16
Supplement: BLOODA_ADV-2023-011771-mmc1.pdf [file BLOODA_ADV-2023-011771-mmc1.pdf]

## Supplementary Material

|           |                                                                                                                                                                                                                                                                                                                                                                                                                                 |         |
|-----------|---------------------------------------------------------------------------------------------------------------------------------------------------------------------------------------------------------------------------------------------------------------------------------------------------------------------------------------------------------------------------------------------------------------------------------|---------|
| Table S1  | Distribution of <i>KMT2A</i> fusion-based groups stratified by I-BFM-SG affiliated study group/country                                                                                                                                                                                                                                                                                                                          | Page 2  |
| Table S2  | Clinical characteristics and outcome of children with <i>KMT2A</i> -rearranged acute myeloid leukemia with and without complete karyotypes                                                                                                                                                                                                                                                                                      | Page 3  |
| Table S3  | Frequency distribution of numerical additional cytogenetic aberrations in the total cohort and stratified by <i>KMT2A</i> fusion-based group                                                                                                                                                                                                                                                                                    | Page 4  |
| Table S4  | Frequency distribution of structural additional cytogenetic aberrations in the total cohort and stratified by <i>KMT2A</i> fusion-based group                                                                                                                                                                                                                                                                                   | Page 6  |
| Table S5  | Univariable Cox regression analyses of event-free survival, cumulative incidence of relapse, and overall survival in childhood <i>KMT2A</i> -rearranged acute myeloid leukemia                                                                                                                                                                                                                                                  | Page 13 |
| Table S6  | Presence and type of additional cytogenetic aberrations by clinical characteristics                                                                                                                                                                                                                                                                                                                                             | Page 15 |
| Table S7  | Survival estimates of children with <i>KMT2A</i> -rearranged acute myeloid leukemia                                                                                                                                                                                                                                                                                                                                             | Page 16 |
| Table S8  | Univariable and multivariable Cox regression analyses of event-free survival, cumulative incidence of relapse, and overall survival in children with <i>KMT2A::MLLT3</i> -rearranged acute myeloid leukemia                                                                                                                                                                                                                     | Page 17 |
| Table S9  | Overview of recurrent additional cytogenetic aberrations that were independently associated with survival over time in childhood <i>KMT2A</i> -rearranged acute myeloid leukemia                                                                                                                                                                                                                                                | Page 20 |
| Figure S1 | Kaplan-Meier estimates of (A) event-free survival, (B) cumulative incidence of relapse, and (C) overall survival of children with <i>KMT2A</i> -rearranged acute myeloid leukemia with and without additional cytogenetic aberrations                                                                                                                                                                                           | Page 21 |
| Figure S2 | Kaplan-Meier estimates of (A/B/C/D/I/J/K/L/Q/R/S) cumulative incidence of relapse and (E/F/G/H/M/N/O/P/T/U/V) overall survival of children with <i>KMT2A</i> -rearranged acute myeloid leukemia and with and without (A, E) add(12p), (B, F) del(9q), (C, G) monosomy 10, (D, H) trisomy 1, (I, M) trisomy 4, (J, N) trisomy 6, (K, O) trisomy 8, (L, P) trisomy 12, (Q, T) trisomy 16, (R, U) trisomy 17, and (S, V) trisomy X | Page 22 |

## Supplementary Tables

**Supplementary Table S1.** Distribution of *KMT2A* fusion-based groups stratified by I-BFM-SG affiliated study group/country

| Fusion-based group                    | AIEOP     |           | BFM       |           | BSPHO     |           | CCLG      |           | COG       |           | CPH       |           | DCOG      |           | Greece    |           | HKPHOSG   |           | INS       |           | JPLSG     |           | LAME      |           | NOPHO     |           | SEHOP     |           | St. Jude  |           | Total |
|---------------------------------------|-----------|-----------|-----------|-----------|-----------|-----------|-----------|-----------|-----------|-----------|-----------|-----------|-----------|-----------|-----------|-----------|-----------|-----------|-----------|-----------|-----------|-----------|-----------|-----------|-----------|-----------|-----------|-----------|-----------|-----------|-------|
|                                       | 2005-2011 | 2005-2011 | 2005-2016 | 2005-2016 | 2010-2016 | 2010-2016 | 2005-2016 | 2005-2016 | 2006-2016 | 2006-2016 | 2006-2016 | 2006-2016 | 2005-2016 | 2005-2016 | 2007-2014 | 2007-2014 | 2010-2013 | 2010-2013 | 2005-2016 | 2005-2016 | 2007-2010 | 2007-2010 | 2005-2015 | 2005-2015 | 2010-2016 | 2010-2016 | 2008-2016 | 2008-2016 | 2005-2016 | 2005-2016 |       |
| 9p22/ <i>KMT2A</i> :: <i>MLLT3</i>    | 20        | 45.5      | 90        | 58.1      | 7         | 35        | 34        | 43.6      | 189       | 38.7      | 17        | 53.1      | 15        | 29.4      | 3         | 60        | 4         | 57.1      | 4         | 40        | 39        | 56.5      | 54        | 40.6      | 26        | 50.0      | 11        | 57.9      | 31        | 33.3      | 544   |
| 10p12/ <i>KMT2A</i> :: <i>MLLT10</i>  | 7         | 15.9      | 32        | 20.6      | 5         | 25        | 12        | 15.4      | 84        | 17.2      | 9         | 28.1      | 14        | 27.5      | 1         | 20        | 0         | 0         | 1         | 10        | 8         | 11.6      | 18        | 13.5      | 9         | 17.3      | 2         | 10.5      | 16        | 17.2      | 218   |
| 6q27/ <i>KMT2A</i> :: <i>AFDN</i>     | 6         | 13.6      | 9         | 5.8       | 1         | 5         | 8         | 10.3      | 39        | 8.0       | 1         | 3.1       | 2         | 3.9       | 0         | 0         | 0         | 0         | 2         | 20        | 3         | 4.3       | 8         | 6.0       | 3         | 5.8       | 1         | 5.3       | 9         | 9.7       | 92    |
| 19p13                                 | 2         | 4.5       | 5         | 3.2       | 1         | 5         | 8         | 10.3      | 0         | 0         | 0         | 0         | 2         | 3.9       | 0         | 0         | 0         | 0         | 0         | 0         | 1         | 1.4       | 0         | 0         | 4         | 7.7       | 0         | 0         | 0         | 0         | 23    |
| 19p13.1/ <i>KMT2A</i> :: <i>ELL</i>   | 0         | 0         | 1         | 0.6       | 1         | 5         | 5         | 6.4       | 36        | 7.4       | 2         | 6.3       | 1         | 2.0       | 0         | 0         | 1         | 14.3      | 0         | 0         | 8         | 11.6      | 5         | 6.4       | 0         | 0         | 0         | 0         | 9         | 9.7       | 75    |
| 19p13.3/ <i>KMT2A</i> :: <i>MLLT1</i> | 0         | 0         | 2         | 1.3       | 1         | 5         | 3         | 3.8       | 27        | 5.5       | 1         | 3.1       | 3         | 5.9       | 0         | 0         | 0         | 0         | 0         | 4         | 5.8       | 7         | 5.3       | 0         | 0         | 0         | 0         | 8         | 8.6       | 56        |       |
| 1q21/ <i>KMT2A</i> :: <i>MLLT11</i>   | 1         | 2.3       | 5         | 3.2       | 2         | 10        | 1         | 1.3       | 11        | 2.3       | 0         | 0         | 0         | 0         | 0         | 0         | 0         | 0         | 0         | 0         | 0         | 6         | 4.5       | 1         | 1.9       | 0         | 0         | 1         | 1.1       | 28        |       |
| 10p11.2/ <i>KMT2A</i> :: <i>AB11</i>  | 2         | 4.5       | 0         | 0         | 0         | 0         | 2         | 2.6       | 15        | 3.1       | 0         | 0         | 0         | 0         | 0         | 0         | 1         | 14.3      | 0         | 0         | 0         | 0         | 2         | 1.5       | 0         | 0         | 0         | 0         | 2         | 2.2       | 24    |
| Xq24/ <i>KMT2A</i> :: <i>SEPT6</i>    | 3         | 6.8       | 0         | 0         | 0         | 0         | 1         | 1.3       | 11        | 2.3       | 0         | 0         | 2         | 3.9       | 0         | 0         | 0         | 0         | 0         | 0         | 0         | 5         | 3.8       | 0         | 0         | 0         | 0         | 0         | 0         | 0         | 22    |
| 17q21                                 | 1         | 2.3       | 0         | 0         | 0         | 0         | 1         | 1.3       | 2         | 0.4       | 0         | 0         | 2         | 3.9       | 1         | 20        | 0         | 0         | 1         | 10        | 1         | 1.4       | 1         | 0.8       | 0         | 0         | 1         | 5.3       | 0         | 0         | 13    |
| 4q21/ <i>KMT2A</i> :: <i>AFF1</i>     | 0         | 0         | 5         | 3.2       | 1         | 5         | 0         | 0         | 3         | 0.6       | 0         | 0         | 1         | 2.0       | 0         | 0         | 0         | 0         | 0         | 0         | 0         | 1         | 0.8       | 1         | 1.9       | 0         | 0         | 0         | 0         | 0         | 12    |
| 1p32/ <i>KMT2A</i> :: <i>EPS15</i>    | 0         | 0         | 1         | 0.6       | 0         | 0         | 0         | 0         | 5         | 1.0       | 0         | 0         | 1         | 2.0       | 0         | 0         | 0         | 0         | 0         | 0         | 0         | 3         | 2.3       | 1         | 1.9       | 1         | 5.3       | 1         | 1.1       | 13        |       |
| 17q12                                 | 0         | 0         | 0         | 0         | 0         | 0         | 0         | 0         | 6         | 1.2       | 0         | 0         | 0         | 0         | 0         | 0         | 0         | 0         | 0         | 0         | 0         | 0         | 0         | 1         | 1.9       | 1         | 5.3       | 2         | 2.2       | 10        |       |
| Other                                 | 2         | 4.5       | 3         | 1.9       | 1         | 5         | 3         | 3.8       | 60        | 12.3      | 2         | 6.3       | 8         | 15.7      | 0         | 0         | 1         | 14.3      | 2         | 20        | 5         | 7.2       | 17        | 12.8      | 6         | 11.5      | 2         | 10.5      | 14        | 15.1      | 126   |
| Total                                 | 44        | 100       | 155       | 100       | 20        | 100       | 78        | 100       | 488       | 100       | 32        | 100       | 51        | 100       | 5         | 100       | 7         | 100       | 10        | 100       | 69        | 100       | 133       | 100       | 52        | 100       | 19        | 100       | 93        | 100       | 1,256 |

9p22/*KMT2A*::*MLLT3* refers to t(9;11)(p22;q23), 10p12/*KMT2A*::*MLLT10* to t(10;11)(p12;q23), 6q27/*KMT2A*::*AFDN* to t(6;11)(q27;q23), 19p13 to t(11;19)(q23;p13)-without ascertained sub-band, 19p13.1/*KMT2A*::*ELL* to t(11;19)(q23;p13.1), 19p13.3/*KMT2A*::*MLLT1* to t(11;19)(q23;p13.3), 1q21/*KMT2A*::*MLLT11* to t(1;11)(q21;q23), 10p11.2/*KMT2A*::*AB11* to t(10;11)(p11.2;q23), Xq24/*KMT2A*::*SEPT6* to t(X;11)(q24;q23), 17q21 to t(11;17)(q23;q21), 4q21/*KMT2A*::*AFF1* to t(4;11)(q21;q23), 1p32/*KMT2A*::*EPS15* to t(1;11)(p32;q23), and 17q12 to t(11;17)(q23;q12). Ten centers affiliated with the CCLG (i.e., Leeds, Bristol, Marsden, Nottingham, Sheffield, Southampton, Edinburgh, Liverpool, Manchester, Newcastle) and one center from Greece participated (i.e., Aghia Sophia Children's hospital (T.A.O.)).

AIEOP, Associazione Italiana Ematologia Oncologia Pediatrica (Italy); BFM, Berlin-Frankfurt-Münster (Germany and Austria); BSPHO, Belgian Society of Pediatric Hematology Oncology (Belgium); CCLG, Children's Cancer and Leukaemia Group (United Kingdom); COG, Children's Oncology Group (United States); CPH, Czech Pediatric Hematology (Czech Republic); DCOG, Dutch Childhood Oncology Group (the Netherlands); HKPHOSG, Hong Kong Pediatric Hematology and Oncology Study Group (Hong Kong); I-BFM-SG, International Berlin-Frankfurt-Münster study group; INS, Israel National Study (Israel); JPLSG, Japanese Pediatric Leukemia/Lymphoma Study Group (Japan); LAME, Leucémie Aiguë Myéloblastique Enfant (France); No., number of patients; NOPHO, Nordic Society for Pediatric Hematology and Oncology (Scandinavia); SEHOP, Spanish Society of Pediatric Hematology and Oncology (Spain); St. Jude, St. Jude Children's Research Hospital (United States); T.A.O., The Department of Pediatric Hematology and Oncology.

**Supplementary Table S2.** Clinical characteristics and outcome of children with *KMT2A*-rearranged acute myeloid leukemia with and without complete karyotypes

| Characteristic                              | Incomplete karyotype | Complete karyotype | P    |
|---------------------------------------------|----------------------|--------------------|------|
| No. (%)                                     | 56 (4.5)             | 1,200 (95.5)       |      |
| Sex, No. (%) (n = 1,235)                    |                      |                    | 0.80 |
| Male                                        | 27 (50)              | 611 (51.7)         |      |
| Female                                      | 27 (50)              | 570 (48.3)         |      |
| Age at diagnosis, years. (n = 1,256)        |                      |                    |      |
| Median (IQR)                                | 2.1 (0.9-10.2)       | 2.5 (1.0-9.9)      | 0.54 |
| WBC count, x10 <sup>9</sup> /L. (n = 1,186) |                      |                    |      |
| Median (IQR)                                | 14.6 (4.8-86.7)      | 21.5 (5.8-87.8)    | 0.62 |
| CNS involvement, No. (%) (n = 722)          |                      |                    |      |
| Negative                                    | 31 (83.8)            | 543 (79.3)         | 0.51 |
| Positive                                    | 6 (16.2)             | 142 (20.7)         |      |
| FAB-type, No. (%) (n = 866)                 |                      |                    | 0.94 |
| FAB-M0                                      | 1 (2.0)              | 17 (2.1)           |      |
| FAB-M1                                      | 3 (5.9)              | 30 (3.7)           |      |
| FAB-M2                                      | 2 (3.9)              | 17 (2.1)           |      |
| FAB-M4                                      | 6 (11.8)             | 115 (14.1)         |      |
| FAB-M5                                      | 35 (68.6)            | 584 (71.7)         |      |
| FAB-M7                                      | 2 (3.9)              | 29 (3.6)           |      |
| FAB unspecified                             | 2 (3.9)              | 23 (2.8)           |      |
| Fusion-based group, No. (%) (n = 1,256)     |                      |                    | 0.18 |
| 9p22/ <i>KMT2A</i> :: <i>MLL3</i>           | 28 (50)              | 516 (43)           |      |
| 10p12/ <i>KMT2A</i> :: <i>MLL10</i>         | 8 (14.3)             | 210 (17.5)         |      |
| 6q27/ <i>KMT2A</i> :: <i>AFDN</i>           | 3 (5.4)              | 89 (7.4)           |      |
| 19p13                                       | 0 (0)                | 23 (1.9)           |      |
| 19p13.1/ <i>KMT2A</i> :: <i>ELL</i>         | 3 (5.4)              | 72 (6)             |      |
| 19p13.3/ <i>KMT2A</i> :: <i>MLL1</i>        | 1 (1.8)              | 55 (4.6)           |      |
| 1q21/ <i>KMT2A</i> :: <i>MLL11</i>          | 0 (0)                | 28 (2.3)           |      |
| 10p11.2/ <i>KMT2A</i> :: <i>ABII</i>        | 0 (0)                | 24 (2)             |      |
| Xq24/ <i>KMT2A</i> :: <i>SEPT6</i>          | 0 (0)                | 22 (1.8)           |      |
| 17q21                                       | 2 (3.6)              | 11 (0.9)           |      |
| 4q21/ <i>KMT2A</i> :: <i>AFF1</i>           | 0 (0)                | 12 (1)             |      |
| 1p32/ <i>KMT2A</i> :: <i>EPS15</i>          | 0 (0)                | 13 (1.1)           |      |
| 17q12                                       | 0 (0)                | 10 (0.8)           |      |
| Other                                       | 11 (19.6)            | 115 (9.6)          |      |
| <b>Clinical outcome</b>                     |                      |                    |      |
| 5-year pEFS (95% CI)                        | 42.1 (26.8-57.4)     | 44.8 (41.9-47.7)   | 0.52 |
| 5-year pCIR (95% CI)                        | 48.6 (32.3-63.1)     | 44.7 (41.5-47.8)   | 0.89 |
| 5-year pOS (95% CI)                         | 58.9 (45-72.8)       | 62.7 (59.8-65.6)   | 0.82 |

9p22/*KMT2A*::*MLL3* refers to t(9;11)(p22;q23), 10p12/*KMT2A*::*MLL10* to t(10;11)(p12;q23), 6q27/*KMT2A*::*AFDN* to t(6;11)(q27;q23), 19p13 to t(11;19)(q23;p13)-without ascertained sub-band, 19p13.1/*KMT2A*::*ELL* to t(11;19)(q23;p13.1), 19p13.3/*KMT2A*::*MLL1* to t(11;19)(q23;p13.3), 1q21/*KMT2A*::*MLL11* to t(1;11)(q21;q23), 10p11.2/*KMT2A*::*ABII* to t(10;11)(p11.2;q23), Xq24/*KMT2A*::*SEPT6* to t(X;11)(q24;q23), 17q21 to t(11;17)(q23;q21), 4q21/*KMT2A*::*AFF1* to t(4;11)(q21;q23), 1p32/*KMT2A*::*EPS15* to t(1;11)(p32;q23), and 17q12 to t(11;17)(q23;q12).

CI, confidence interval; CNS, central nervous system; FAB, French-American-British; IQR, interquartile range; No., number of patients; pCIR, probability of cumulative incidence of relapse; pEFS, probability of event-free survival; pOS, probability of overall survival; WBC, white blood cell count.

**Supplementary Table S3.** Frequency distribution of numerical additional cytogenetic aberrations in the total cohort and stratified by *KMT2A* fusion-based group

| Trisomy | Total | 9p22<br>No. (%) | 10p12<br>No. (%) | 6q27<br>No. (%) | 19p13<br>No. (%) | 19p13.1<br>No. (%) | 19p13.3<br>No. (%) | 1q21<br>No. (%) | 10p11.2<br>No. (%) | Xq24<br>No. (%) | 17q21<br>No. (%) | 4q21<br>No. (%) | 1p32<br>No. (%) | 17q12<br>No. (%) | Other<br>No. (%) |
|---------|-------|-----------------|------------------|-----------------|------------------|--------------------|--------------------|-----------------|--------------------|-----------------|------------------|-----------------|-----------------|------------------|------------------|
| 1       | 15    | 10 (66.7)       | -                | -               | -                | 3 (20)             | -                  | -               | -                  | -               | -                | -               | -               | 1 (6.7)          | 1 (6.7)          |
| 2       | 4     | 2 (50)          | 1 (25)           | -               | -                | -                  | -                  | -               | -                  | 1 (25)          | -                | -               | -               | -                | -                |
| 3       | 16    | 10 (62.5)       | 3 (18.8)         | 1 (6.3)         | -                | -                  | -                  | -               | -                  | -               | -                | -               | -               | -                | 2 (12.5)         |
| 4       | 25    | 8 (32)          | 6 (24)           | 8 (32)          | -                | -                  | 1 (4)              | -               | -                  | -               | -                | -               | -               | -                | 2 (8)            |
| 5       | 6     | 3 (50)          | 2 (33.3)         | 1 (16.7)        | -                | -                  | -                  | -               | -                  | -               | -                | -               | -               | -                | -                |
| 6*      | 65    | 31 (47.7)       | 13 (20)          | 3 (4.6)         | 1 (1.5)          | -                  | 4 (6.2)            | 1 (1.5)         | -                  | 1 (1.5)         | 3 (4.6)          | 1 (1.5)         | -               | 1 (1.5)          | 6 (9.2)          |
| 7       | 10    | 5 (50)          | 1 (10)           | 3 (30)          | -                | -                  | -                  | -               | -                  | -               | -                | -               | 1 (10)          | -                | -                |
| 8*      | 210   | 119 (56.7)      | 22 (10.5)        | 8 (3.8)         | 9 (4.3)          | 18 (8.6)           | 13 (6.2)           | 2 (1.0)         | 1 (0.5)            | 1 (0.5)         | 1 (0.5)          | 2 (1.0)         | 2 (1.0)         | 1 (0.5)          | 11 (5.2)         |
| 9       | 18    | 10 (55.6)       | 1 (5.6)          | 2 (11.1)        | -                | 1 (5.6)            | 2 (11.1)           | -               | -                  | -               | -                | 1 (5.6)         | 1 (5.6)         | -                | -                |
| 10      | 6     | 3 (50)          | 1 (16.7)         | 1 (16.7)        | -                | 1 (16.7)           | -                  | -               | -                  | -               | -                | -               | -               | -                | -                |
| 11      | 4     | 4 (100)         | -                | -               | -                | -                  | -                  | -               | -                  | -               | -                | -               | -               | -                | -                |
| 12      | 14    | 6 (42.9)        | 4 (28.6)         | 1 (7.1)         | -                | -                  | 1 (7.1)            | -               | -                  | -               | 2 (14.3)         | -               | -               | -                | -                |
| 13      | 18    | 4 (22.2)        | 2 (11.1)         | 3 (16.7)        | 2 (11.1)         | 2 (11.1)           | 2 (11.1)           | -               | -                  | 1 (5.6)         | 1 (5.6)          | 1 (5.6)         | -               | -                | -                |
| 14      | 12    | 9 (75)          | 1 (8.3)          | -               | -                | -                  | -                  | -               | -                  | -               | -                | -               | -               | -                | 2 (16.7)         |
| 15      | 7     | 4 (57.1)        | 2 (28.6)         | -               | -                | -                  | 1 (14.3)           | -               | -                  | -               | -                | -               | -               | -                | -                |
| 16      | 13    | 7 (53.8)        | 4 (30.8)         | 1 (7.7)         | -                | -                  | -                  | -               | -                  | -               | -                | -               | -               | -                | 1 (7.7)          |
| 17      | 10    | 6 (60)          | 1 (10)           | -               | -                | -                  | 2 (20)             | -               | -                  | -               | -                | -               | -               | -                | 1 (10)           |
| 18      | 23    | 11 (47.8)       | 4 (17.4)         | 2 (8.7)         | -                | 1 (4.3)            | 1 (4.3)            | -               | -                  | -               | 1 (4.3)          | -               | 1 (4.3)         | -                | 2 (8.7)          |
| 19*     | 79    | 43 (54.4)       | 7 (8.9)          | 11 (13.9)       | -                | -                  | 3 (3.8)            | 1 (1.3)         | 1 (1.3)            | 2 (2.5)         | 1 (1.3)          | 1 (1.3)         | -               | 1 (1.3)          | 8 (10.1)         |
| 20*     | 26    | 13 (50)         | 5 (19.2)         | 3 (11.5)        | 1 (3.8)          | -                  | 2 (7.7)            | -               | -                  | -               | -                | -               | -               | -                | 2 (7.7)          |
| 21*     | 51    | 24 (47.1)       | 12 (23.5)        | 10 (19.6)       | 1 (2.0)          | -                  | 1 (2.0)            | 1 (2.0)         | -                  | -               | -                | -               | -               | -                | 2 (3.9)          |
| 22*     | 27    | 16 (59.3)       | 4 (14.8)         | 1 (3.7)         | -                | -                  | 1 (3.7)            | -               | -                  | -               | 1 (3.7)          | 2 (7.4)         | -               | -                | 2 (7.4)          |
| X       | 15    | 5 (33.3)        | 2 (13.3)         | 2 (13.3)        | 2 (13.3)         | -                  | -                  | -               | -                  | -               | 1 (6.7)          | 1 (6.7)         | 1 (6.7)         | -                | 1 (6.7)          |
| Y       | 3     | 1 (33.3)        | -                | 1 (33.3)        | -                | 1 (33.3)           | -                  | -               | -                  | -               | -                | -               | -               | -                | -                |

Highlighted in green are the recurring numerical ACAs (i.e., occurring in at least 10 patients). 9p22 refers to *KMT2A::MLLT3/t(9;11)(p22;q23)*, 10p12 to *KMT2A::MLLT10/t(10;11)(p12;q23)*, 6q27 to *KMT2A::AFDN/t(6;11)(q27;q23)*, 19p13 to *t(11;19)(q23;p13)*-without ascertained sub-band, 19p13.1 to *KMT2A::ELL/t(11;19)(q23;p13.1)*, 19p13.3 to *KMT2A::MLLT1/t(11;19)(q23;p13.3)*, 1q21 to *KMT2A::MLLT11/t(1;11)(q21;q23)*, 10p11.2 to *KMT2A::AB11/t(10;11)(p11.2;q23)*, Xq24 to *KMT2A::SEPT6/t(X;11)(q24;q23)*, 17q21 to *t(11;17)(q23;q21)*, 4q21 to *KMT2A::AFF1/t(4;11)(q21;q23)*, 1p32 to *KMT2A::EPS15/t(1;11)(p32;q23)*, and 17q12 to *t(11;17)(q23;q12)*.

No., number of patients.

\*Two additional copies of chromosome 6 ( $n = 3$  patients), two additional copies of chromosome 8 ( $n = 12$  patients), three additional copies of chromosome 8 ( $n = 1$  patient), two additional copies of chromosome 19 ( $n = 1$  patient), two additional copies of chromosome 20 ( $n = 1$  patient), two additional copies of chromosome 21 ( $n = 7$  patients), three additional copies of chromosome 21 ( $n = 4$  patients), and two additional copies of chromosome 22 ( $n = 1$  patient).

**Supplementary Table S3.** Continued

| <b>Monosomy</b> | <b>Total</b> | <b>9p22<br/>No. (%)</b> | <b>10p12<br/>No. (%)</b> | <b>6q27<br/>No. (%)</b> | <b>19p13<br/>No. (%)</b> | <b>19p13.1<br/>No. (%)</b> | <b>19p13.3<br/>No. (%)</b> | <b>1q21<br/>No. (%)</b> | <b>10p11.2<br/>No. (%)</b> | <b>Xq24<br/>No. (%)</b> | <b>17q21<br/>No. (%)</b> | <b>4q21<br/>No. (%)</b> | <b>1p32<br/>No. (%)</b> | <b>17q12<br/>No. (%)</b> | <b>Other<br/>No. (%)</b> |
|-----------------|--------------|-------------------------|--------------------------|-------------------------|--------------------------|----------------------------|----------------------------|-------------------------|----------------------------|-------------------------|--------------------------|-------------------------|-------------------------|--------------------------|--------------------------|
| 1               | 2            | 1 (50)                  | -                        | -                       | -                        | -                          | -                          | -                       | -                          | -                       | -                        | -                       | -                       | -                        | 1 (50)                   |
| 4               | 1            | 1 (100)                 | -                        | -                       | -                        | -                          | -                          | -                       | -                          | -                       | -                        | -                       | -                       | -                        | -                        |
| 5               | 3            | 2 (66.7)                | -                        | -                       | -                        | -                          | -                          | -                       | -                          | -                       | -                        | 1 (33.3)                | -                       | -                        | -                        |
| 6               | 2            | -                       | -                        | -                       | -                        | 2 (100)                    | -                          | -                       | -                          | -                       | -                        | -                       | -                       | -                        | -                        |
| 7               | 13           | 6 (46.2)                | 4 (30.8)                 | -                       | -                        | -                          | 1 (7.7)                    | -                       | -                          | -                       | 1 (7.7)                  | -                       | -                       | -                        | 1 (7.7)                  |
| 8               | 1            | 1 (100)                 | -                        | -                       | -                        | -                          | -                          | -                       | -                          | -                       | -                        | -                       | -                       | -                        | -                        |
| 9               | 5            | -                       | 2 (40)                   | -                       | -                        | 1 (20)                     | -                          | -                       | -                          | -                       | -                        | -                       | -                       | -                        | 2 (40)                   |
| 10              | 13           | 2 (15.4)                | 4 (30.8)                 | 1 (7.7)                 | -                        | -                          | -                          | -                       | -                          | -                       | -                        | -                       | -                       | -                        | 6 (46.2)                 |
| 11              | 6            | 1 (16.7)                | 3 (50)                   | -                       | -                        | -                          | -                          | -                       | -                          | -                       | -                        | -                       | -                       | -                        | 2 (33.3)                 |
| 12              | 3            | -                       | -                        | -                       | -                        | -                          | -                          | -                       | -                          | 1 (33.3)                | -                        | -                       | -                       | -                        | 2 (66.7)                 |
| 13              | 7            | 2 (28.6)                | -                        | 1 (14.3)                | -                        | -                          | -                          | -                       | -                          | -                       | -                        | 1 (14.3)                | -                       | -                        | 3 (42.9)                 |
| 14              | 2            | -                       | 1 (50)                   | -                       | -                        | -                          | -                          | -                       | -                          | -                       | -                        | -                       | -                       | -                        | 1 (50)                   |
| 15              | 2            | 1 (50)                  | 1 (50)                   | -                       | -                        | -                          | -                          | -                       | -                          | -                       | -                        | -                       | -                       | -                        | -                        |
| 16              | 2            | -                       | 1 (50)                   | -                       | -                        | -                          | -                          | -                       | -                          | -                       | -                        | -                       | -                       | -                        | 1 (50)                   |
| 17              | 1            | -                       | -                        | -                       | -                        | 1 (100)                    | -                          | -                       | -                          | -                       | -                        | -                       | -                       | -                        | -                        |
| 18              | 2            | 1 (50)                  | -                        | -                       | -                        | 1 (50)                     | -                          | -                       | -                          | -                       | -                        | -                       | -                       | -                        | -                        |
| 19              | 1            | -                       | -                        | -                       | -                        | 1 (100)                    | -                          | -                       | -                          | -                       | -                        | -                       | -                       | -                        | -                        |
| 21              | 2            | -                       | -                        | 1 (50)                  | -                        | -                          | 1 (50)                     | -                       | -                          | -                       | -                        | -                       | -                       | -                        | -                        |
| X               | 6            | 3 (50)                  | 1 (16.7)                 | -                       | -                        | 1 (16.7)                   | -                          | -                       | -                          | -                       | -                        | -                       | -                       | -                        | 1 (16.7)                 |
| Y               | 9            | 1 (11.1)                | 2 (22.2)                 | -                       | -                        | 2 (22.2)                   | -                          | -                       | 1 (11.1)                   | -                       | 1 (11.1)                 | -                       | -                       | -                        | 2 (22.2)                 |

**Supplementary Table S4.** Frequency distribution of structural additional cytogenetic aberrations in the total cohort and stratified by *KMT2A* fusion-based group

| Structural aberration | Total | 9p22<br>No. (%) | 10p12<br>No. (%) | 6q27<br>No. (%) | 19p13<br>No. (%) | 19p13.1<br>No. (%) | 19p13.3<br>No. (%) | 1q21<br>No. (%) | 10p11.2<br>No. (%) | Xq24<br>No. (%) | 17q21<br>No. (%) | 4q21<br>No. (%) | 1p32<br>No. (%) | 17q12<br>No. (%) | Other<br>No. (%) |
|-----------------------|-------|-----------------|------------------|-----------------|------------------|--------------------|--------------------|-----------------|--------------------|-----------------|------------------|-----------------|-----------------|------------------|------------------|
| add(1p)               | 14    | 8 (57.1)        | 3 (21.4)         | -               | -                | -                  | -                  | -               | -                  | -               | -                | 1 (7.1)         | -               | -                | 2 (14.3)         |
| add(1q)               | 1     | 1 (100)         | -                | -               | -                | -                  | -                  | -               | -                  | -               | -                | -               | -               | -                | -                |
| add(2p)               | 1     | -               | 1 (100)          | -               | -                | -                  | -                  | -               | -                  | -               | -                | -               | -               | -                | -                |
| add(2q)               | 1     | -               | -                | -               | -                | -                  | -                  | -               | -                  | -               | -                | -               | -               | -                | 1 (100)          |
| add(3p)               | 1     | -               | -                | -               | -                | -                  | -                  | -               | -                  | -               | -                | -               | -               | -                | 1 (100)          |
| add(3q)               | 3     | -               | 2 (66.7)         | -               | -                | -                  | -                  | -               | 1 (33.3)           | -               | -                | -               | -               | -                | -                |
| add(4p)               | 2     | 1 (50)          | -                | -               | -                | -                  | -                  | 1 (50)          | -                  | -               | -                | -               | -               | -                | -                |
| add(4q)               | 2     | -               | 1 (50)           | 1 (50)          | -                | -                  | -                  | -               | -                  | -               | -                | -               | -               | -                | -                |
| add(5p)               | 1     | -               | -                | 1 (100)         | -                | -                  | -                  | -               | -                  | -               | -                | -               | -               | -                | -                |
| add(5q)               | 3     | 1 (33.3)        | -                | -               | -                | -                  | -                  | -               | -                  | -               | -                | -               | -               | -                | 2 (66.7)         |
| add(6q)               | 1     | 1 (100)         | -                | -               | -                | -                  | -                  | -               | -                  | -               | -                | -               | -               | -                | -                |
| add(7p)               | 3     | 2 (66.7)        | -                | -               | -                | -                  | -                  | -               | -                  | -               | -                | -               | -               | -                | 1 (33.3)         |
| add(7q)               | 4     | -               | 2 (50)           | -               | -                | -                  | -                  | -               | -                  | -               | -                | -               | -               | 1 (25)           | 1 (25)           |
| add(8p)               | 6     | -               | 3 (50)           | 1 (16.7)        | -                | -                  | 1 (16.7)           | -               | 1 (16.7)           | -               | -                | -               | -               | -                | -                |
| add(8q)               | 1     | -               | 1 (100)          | -               | -                | -                  | -                  | -               | -                  | -               | -                | -               | -               | -                | -                |
| add(9q)               | 3     | 1 (33.3)        | 1 (33.3)         | -               | -                | -                  | -                  | 1 (33.3)        | -                  | -               | -                | -               | -               | -                | -                |
| add(10p)              | 2     | 1 (50)          | -                | -               | -                | -                  | 1 (50)             | -               | -                  | -               | -                | -               | -               | -                | -                |
| add(10q)              | 1     | -               | -                | -               | -                | -                  | -                  | -               | -                  | -               | -                | -               | -               | -                | 1 (100)          |
| add(11p)              | 1     | -               | -                | -               | -                | -                  | -                  | -               | -                  | -               | -                | -               | -               | -                | 1 (100)          |
| add(11q)              | 3     | -               | 1 (33.3)         | -               | -                | -                  | 1 (33.3)           | -               | -                  | -               | -                | -               | -               | -                | 1 (33.3)         |
| add(12p)              | 13    | 1 (7.7)         | 2 (15.4)         | 4 (30.8)        | -                | 1 (7.7)            | -                  | -               | -                  | -               | -                | -               | 1 (7.7)         | 1 (7.7)          | 3 (23.1)         |
| add(13p)              | 1     | 1 (100)         | -                | -               | -                | -                  | -                  | -               | -                  | -               | -                | -               | -               | -                | -                |
| add(13q)              | 1     | 1 (100)         | -                | -               | -                | -                  | -                  | -               | -                  | -               | -                | -               | -               | -                | -                |
| add(14q)              | 4     | 1 (25)          | -                | 1 (25)          | -                | -                  | -                  | -               | -                  | -               | -                | -               | -               | -                | 2 (50)           |
| add(15q)              | 2     | -               | 1 (50)           | -               | -                | -                  | -                  | -               | -                  | -               | -                | -               | -               | -                | 1 (50)           |
| add(16p)              | 2     | -               | 2 (100)          | -               | -                | -                  | -                  | -               | -                  | -               | -                | -               | -               | -                | -                |
| add(16q)              | 4     | 2 (50)          | 2 (50)           | -               | -                | -                  | -                  | -               | -                  | -               | -                | -               | -               | -                | -                |
| add(17p)              | 4     | 2 (50)          | 2 (50)           | -               | -                | -                  | -                  | -               | -                  | -               | -                | -               | -               | -                | -                |
| add(17q)              | 2     | -               | -                | 1 (50)          | -                | 1 (50)             | -                  | -               | -                  | -               | -                | -               | -               | -                | -                |
| add(18p)              | 1     | -               | -                | -               | -                | -                  | -                  | 1 (100)         | -                  | -               | -                | -               | -               | -                | -                |
| add(18q)              | 1     | 1 (100)         | -                | -               | -                | -                  | -                  | -               | -                  | -               | -                | -               | -               | -                | -                |
| add(19p)              | 1     | -               | -                | -               | -                | -                  | -                  | 1 (100)         | -                  | -               | -                | -               | -               | -                | -                |
| add(20p)              | 3     | 1 (33.3)        | -                | 1 (33.3)        | -                | -                  | -                  | -               | -                  | -               | -                | -               | -               | -                | 1 (33.3)         |
| add(20q)              | 4     | 1 (25)          | 3 (75)           | -               | -                | -                  | -                  | -               | -                  | -               | -                | -               | -               | -                | -                |
| add(22q)              | 4     | 1 (25)          | 3 (75)           | -               | -                | -                  | -                  | -               | -                  | -               | -                | -               | -               | -                | -                |
| add(Xq)               | 2     | -               | -                | -               | -                | -                  | -                  | 1 (50)          | -                  | -               | -                | -               | -               | -                | 1 (50)           |
| del(1p)*              | 10    | 4 (40)          | 3 (30)           | -               | -                | 1 (10)             | -                  | -               | -                  | -               | -                | -               | 1 (10)          | -                | 1 (10)           |
| del(1q)               | 3     | -               | -                | -               | -                | 1 (33.3)           | -                  | -               | -                  | -               | -                | 2 (66.7)        | -               | -                | -                |
| del(2q)               | 2     | 1 (50)          | -                | 1 (50)          | -                | -                  | -                  | -               | -                  | -               | -                | -               | -               | -                | -                |
| del(3p)               | 3     | 1 (33.3)        | 1 (33.3)         | -               | -                | -                  | -                  | -               | -                  | -               | -                | -               | -               | -                | 1 (33.3)         |
| del(3q)               | 2     | -               | 1 (50)           | -               | -                | -                  | -                  | -               | -                  | -               | -                | -               | -               | -                | 1 (50)           |
| del(4p)               | 1     | 1 (100)         | -                | -               | -                | -                  | -                  | -               | -                  | -               | -                | -               | -               | -                | -                |

| Structural aberration | Total | 9p22<br>No. (%) | 10p12<br>No. (%) | 6q27<br>No. (%) | 19p13<br>No. (%) | 19p13.1<br>No. (%) | 19p13.3<br>No. (%) | 1q21<br>No. (%) | 10p11.2<br>No. (%) | Xq24<br>No. (%) | 17q21<br>No. (%) | 4q21<br>No. (%) | 1p32<br>No. (%) | 17q12<br>No. (%) | Other<br>No. (%) |
|-----------------------|-------|-----------------|------------------|-----------------|------------------|--------------------|--------------------|-----------------|--------------------|-----------------|------------------|-----------------|-----------------|------------------|------------------|
| del(4q)               | 1     | -               | 1 (100)          | -               | -                | -                  | -                  | -               | -                  | -               | -                | -               | -               | -                | -                |
| del(4?)               | 1     | 1 (100)         | -                | -               | -                | -                  | -                  | -               | -                  | -               | -                | -               | -               | -                | -                |
| del(5q)               | 5     | 2 (40)          | -                | 1 (20)          | -                | 1 (20)             | -                  | -               | -                  | -               | -                | 1 (20)          | -               | -                | -                |
| del(6p)               | 1     | -               | 1 (100)          | -               | -                | -                  | -                  | -               | -                  | -               | -                | -               | -               | -                | -                |
| del(6q)               | 2     | 2 (100)         | -                | -               | -                | -                  | -                  | -               | -                  | -               | -                | -               | -               | -                | -                |
| del(7p)               | 1     | -               | -                | -               | -                | 1 (100)            | -                  | -               | -                  | -               | -                | -               | -               | -                | -                |
| del(7q)               | 5     | 1 (20)          | 1 (20)           | -               | -                | 1 (20)             | 1 (20)             | -               | -                  | -               | -                | -               | -               | -                | 1 (20)           |
| del(8p)*              | 2     | -               | -                | -               | 2 (100)          | -                  | -                  | -               | -                  | -               | -                | -               | -               | -                | -                |
| del(9p)*              | 5     | 2 (40)          | -                | -               | -                | 1 (20)             | 1 (20)             | -               | -                  | -               | -                | -               | -               | -                | 1 (20)           |
| del(9q)*              | 16    | 6 (37.5)        | 2 (12.5)         | 1 (6.3)         | -                | 2 (12.5)           | -                  | -               | 2 (12.5)           | -               | -                | -               | 1 (6.3)         | -                | 2 (12.5)         |
| del(10p)              | 3     | -               | 1 (33.3)         | -               | -                | -                  | -                  | -               | -                  | -               | -                | 1 (33.3)        | -               | -                | 1 (33.3)         |
| del(10q)              | 2     | -               | 1 (50)           | -               | -                | 1 (50)             | -                  | -               | -                  | -               | -                | -               | -               | -                | -                |
| del(11p)              | 3     | 1 (33.3)        | -                | 1 (33.3)        | -                | -                  | -                  | 1 (33.3)        | -                  | -               | -                | -               | -               | -                | -                |
| del(11q)              | 7     | 2 (28.6)        | 2 (28.6)         | -               | -                | -                  | -                  | -               | -                  | 1 (14.3)        | -                | 1 (14.3)        | -               | -                | 1 (14.3)         |
| del(12p)              | 9     | 2 (22.2)        | 3 (33.3)         | 2 (22.2)        | -                | -                  | -                  | -               | -                  | -               | -                | -               | -               | -                | 2 (22.2)         |
| del(12q)              | 1     | -               | 1 (100)          | -               | -                | -                  | -                  | -               | -                  | -               | -                | -               | -               | -                | -                |
| del(13q)              | 10    | 6 (60)          | 2 (20)           | -               | -                | -                  | 1 (10)             | -               | -                  | -               | -                | -               | -               | -                | 1 (10)           |
| del(14q)              | 4     | 1 (25)          | -                | 1 (25)          | -                | -                  | -                  | -               | -                  | -               | -                | -               | -               | -                | 2 (50)           |
| del(15q)              | 2     | -               | 1 (50)           | -               | -                | -                  | -                  | -               | -                  | -               | -                | -               | -               | -                | 1 (50)           |
| del(16q)              | 1     | -               | -                | -               | -                | -                  | -                  | -               | -                  | -               | -                | -               | -               | -                | 1 (100)          |
| del(17p)              | 2     | -               | -                | -               | -                | -                  | -                  | -               | -                  | -               | -                | -               | -               | -                | 2 (100)          |
| del(17q)              | 3     | 1 (33.3)        | -                | -               | -                | -                  | -                  | -               | 1 (33.3)           | -               | -                | 1 (33.3)        | -               | -                | -                |
| del(18p)              | 1     | -               | -                | -               | -                | -                  | 1 (100)            | -               | -                  | -               | -                | -               | -               | -                | -                |
| del(18q)              | 2     | 1 (50)          | -                | -               | -                | -                  | -                  | -               | -                  | -               | -                | 1 (50)          | -               | -                | -                |
| del(19p)              | 1     | -               | -                | -               | -                | -                  | -                  | -               | -                  | -               | -                | -               | -               | -                | 1 (100)          |
| del(20q)              | 2     | -               | 1 (50)           | -               | -                | -                  | -                  | -               | -                  | -               | -                | -               | -               | -                | 1 (50)           |
| del(21q)              | 1     | -               | -                | -               | -                | -                  | -                  | -               | -                  | -               | -                | -               | -               | -                | 1 (100)          |
| del(22q)              | 1     | -               | 1 (100)          | -               | -                | -                  | -                  | -               | -                  | -               | -                | -               | -               | -                | -                |
| del(Xq)               | 1     | 1 (100)         | -                | -               | -                | -                  | -                  | -               | -                  | -               | -                | -               | -               | -                | -                |
| der(1p)               | 3     | 2 (66.7)        | 1 (33.3)         | -               | -                | -                  | -                  | -               | -                  | -               | -                | -               | -               | -                | -                |
| der(1q)               | 2     | 1 (50)          | -                | -               | -                | -                  | -                  | -               | -                  | -               | -                | -               | -               | -                | 1 (50)           |
| der(1pq)              | 4     | 4 (100)         | -                | -               | -                | -                  | -                  | -               | -                  | -               | -                | -               | -               | -                | -                |
| der(2p)               | 1     | -               | -                | -               | -                | -                  | -                  | -               | -                  | -               | -                | -               | -               | -                | 1 (100)          |
| der(2q)               | 4     | 2 (50)          | 1 (25)           | -               | -                | -                  | -                  | -               | -                  | -               | 1 (25)           | -               | -               | -                | -                |
| der(3p)               | 3     | 2 (66.7)        | -                | -               | -                | -                  | -                  | -               | -                  | -               | -                | -               | -               | -                | 1 (33.3)         |
| der(3q)               | 2     | -               | 1 (50)           | -               | -                | -                  | -                  | -               | -                  | -               | -                | -               | -               | -                | 1 (50)           |
| der(3pq)              | 1     | 1 (100)         | -                | -               | -                | -                  | -                  | -               | -                  | -               | -                | -               | -               | -                | -                |
| der(4p)               | 1     | 1 (100)         | -                | -               | -                | -                  | -                  | -               | -                  | -               | -                | -               | -               | -                | -                |
| der(4q)               | 1     | 1 (100)         | -                | -               | -                | -                  | -                  | -               | -                  | -               | -                | -               | -               | -                | -                |
| der(4pq)              | 1     | -               | -                | -               | -                | -                  | -                  | -               | -                  | -               | -                | -               | -               | -                | 1 (100)          |
| der(5q)*              | 1     | -               | 1 (100)          | -               | -                | -                  | -                  | -               | -                  | -               | -                | -               | -               | -                | -                |
| der(6p)               | 4     | 3 (75)          | -                | -               | -                | -                  | -                  | -               | -                  | -               | -                | -               | -               | -                | 1 (25)           |
| der(6q)               | 1     | -               | -                | -               | -                | -                  | -                  | -               | -                  | -               | -                | -               | -               | -                | 1 (100)          |
| der(6?)               | 1     | -               | 1 (100)          | -               | -                | -                  | -                  | -               | -                  | -               | -                | -               | -               | -                | -                |

| Structural aberration | Total | 9p22<br>No. (%) | 10p12<br>No. (%) | 6q27<br>No. (%) | 19p13<br>No. (%) | 19p13.1<br>No. (%) | 19p13.3<br>No. (%) | 1q21<br>No. (%) | 10p11.2<br>No. (%) | Xq24<br>No. (%) | 17q21<br>No. (%) | 4q21<br>No. (%) | 1p32<br>No. (%) | 17q12<br>No. (%) | Other<br>No. (%) |
|-----------------------|-------|-----------------|------------------|-----------------|------------------|--------------------|--------------------|-----------------|--------------------|-----------------|------------------|-----------------|-----------------|------------------|------------------|
| der(7p)               | 2     | 2 (100)         | -                | -               | -                | -                  | -                  | -               | -                  | -               | -                | -               | -               | -                | -                |
| der(7q)               | 7     | 3 (42.9)        | 2 (28.6)         | -               | 2 (28.6)         | -                  | -                  | -               | -                  | -               | -                | -               | -               | -                | -                |
| der(7pq)              | 1     | -               | -                | -               | -                | -                  | -                  | -               | -                  | -               | -                | 1 (100)         | -               | -                | -                |
| der(8p)               | 2     | 1 (50)          | -                | -               | -                | -                  | -                  | -               | 1 (50)             | -               | -                | -               | -               | -                | -                |
| der(8q)               | 2     | 2 (100)         | -                | -               | -                | -                  | -                  | -               | -                  | -               | -                | -               | -               | -                | -                |
| der(9p)               | 4     | -               | 1 (25)           | -               | -                | -                  | -                  | -               | -                  | -               | -                | -               | -               | -                | 3 (75)           |
| der(9q)               | 4     | 2 (50)          | 1 (25)           | -               | -                | -                  | 1 (25)             | -               | -                  | -               | -                | -               | -               | -                | -                |
| der(9?)               | 1     | -               | 1 (100)          | -               | -                | -                  | -                  | -               | -                  | -               | -                | -               | -               | -                | -                |
| der(10)               | 4     | 1 (25)          | 1 (25)           | -               | -                | -                  | -                  | -               | -                  | 1 (25)          | -                | 1 (25)          | -               | -                | -                |
| der(10q)              | 1     | -               | -                | -               | -                | 1 (100)            | -                  | -               | -                  | -               | -                | -               | -               | -                | -                |
| der(11p)              | 2     | 1 (50)          | 1 (50)           | -               | -                | -                  | -                  | -               | -                  | -               | -                | -               | -               | -                | -                |
| der(11q) <sup>*</sup> | 7     | 2 (28.6)        | 1 (14.3)         | -               | 1 (14.3)         | -                  | -                  | -               | 1 (14.3)           | -               | -                | -               | -               | -                | 2 (28.6)         |
| der(12p)              | 5     | 2 (40)          | -                | -               | -                | -                  | -                  | -               | 3 (60)             | -               | -                | -               | -               | -                | -                |
| der(12q)              | 1     | -               | 1 (100)          | -               | -                | -                  | -                  | -               | -                  | -               | -                | -               | -               | -                | -                |
| der(13p) <sup>*</sup> | 2     | -               | -                | -               | -                | -                  | -                  | -               | 1 (50)             | -               | -                | 1 (50)          | -               | -                | -                |
| der(13q)              | 3     | 1 (33.3)        | 1 (33.3)         | -               | -                | -                  | -                  | -               | -                  | -               | -                | -               | -               | -                | 1 (33.3)         |
| der(14p)              | 2     | -               | -                | -               | -                | -                  | 1 (50)             | -               | 1 (50)             | -               | -                | -               | -               | -                | -                |
| der(14q)              | 2     | 1 (50)          | -                | -               | -                | -                  | -                  | -               | -                  | -               | -                | -               | 1 (50)          | -                | -                |
| der(15p)              | 3     | -               | 2 (66.7)         | -               | -                | -                  | -                  | -               | -                  | -               | -                | -               | -               | -                | 1 (33.3)         |
| der(15q)              | 3     | 2 (66.7)        | -                | -               | -                | -                  | -                  | -               | -                  | -               | -                | -               | -               | -                | 1 (33.3)         |
| der(16q)              | 1     | 1 (100)         | -                | -               | -                | -                  | -                  | -               | -                  | -               | -                | -               | -               | -                | -                |
| der(17p)              | 1     | -               | 1 (100)          | -               | -                | -                  | -                  | -               | -                  | -               | -                | -               | -               | -                | -                |
| der(17q)              | 2     | -               | -                | 1 (50)          | -                | -                  | -                  | -               | -                  | -               | -                | -               | -               | -                | 1 (50)           |
| der(17?)              | 1     | -               | 1 (100)          | -               | -                | -                  | -                  | -               | -                  | -               | -                | -               | -               | -                | -                |
| der(18p)              | 1     | 1 (100)         | -                | -               | -                | -                  | -                  | -               | -                  | -               | -                | -               | -               | -                | -                |
| der(18q)              | 3     | -               | 1 (33.3)         | -               | -                | -                  | 1 (33.3)           | -               | -                  | -               | -                | 1 (33.3)        | -               | -                | -                |
| der(19p)              | 2     | 1 (50)          | 1 (50)           | -               | -                | -                  | -                  | -               | -                  | -               | -                | -               | -               | -                | -                |
| der(19?)              | 1     | -               | -                | -               | -                | -                  | -                  | -               | -                  | -               | -                | -               | -               | -                | 1 (100)          |
| der(20q)              | 4     | 2 (50)          | 1 (25)           | -               | -                | -                  | -                  | -               | -                  | -               | -                | -               | -               | -                | 1 (25)           |
| der(21p)              | 2     | 2 (100)         | -                | -               | -                | -                  | -                  | -               | -                  | -               | -                | -               | -               | -                | -                |
| der(21q)              | 1     | -               | 1 (100)          | -               | -                | -                  | -                  | -               | -                  | -               | -                | -               | -               | -                | -                |
| der(22q) <sup>*</sup> | 3     | -               | 2 (66.7)         | -               | -                | -                  | -                  | -               | -                  | -               | -                | 1 (33.3)        | -               | -                | -                |
| der(Xp)               | 1     | -               | 1 (100)          | -               | -                | -                  | -                  | -               | -                  | -               | -                | -               | -               | -                | -                |
| der(Xq)               | 1     | 1 (100)         | -                | -               | -                | -                  | -                  | -               | -                  | -               | -                | -               | -               | -                | -                |
| der(Yq)               | 1     | 1 (100)         | -                | -               | -                | -                  | -                  | -               | -                  | -               | -                | -               | -               | -                | -                |
| der(1;5)(q;p)         | 1     | -               | 1 (100)          | -               | -                | -                  | -                  | -               | -                  | -               | -                | -               | -               | -                | -                |
| der(1;13)(q;q)        | 1     | -               | 1 (100)          | -               | -                | -                  | -                  | -               | -                  | -               | -                | -               | -               | -                | -                |
| der(1;15)(q;q)        | 1     | -               | 1 (100)          | -               | -                | -                  | -                  | -               | -                  | -               | -                | -               | -               | -                | -                |
| der(1;18)(q;q)        | 1     | -               | -                | -               | -                | -                  | -                  | -               | -                  | -               | -                | -               | -               | -                | -                |
| der(1;22)(q;q)        | 1     | 1 (100)         | -                | -               | -                | -                  | -                  | -               | -                  | -               | -                | -               | -               | 1 (100)          | -                |
| der(8;12)(q;q)        | 2     | -               | 1 (50)           | -               | -                | -                  | -                  | -               | 1 (50)             | -               | -                | -               | -               | -                | -                |
| der(12;19)(q;p)       | 1     | -               | -                | -               | -                | -                  | 1 (100)            | -               | -                  | -               | -                | -               | -               | -                | -                |
| der(X;1)(q;q)         | 1     | -               | -                | -               | -                | 1 (100)            | -                  | -               | -                  | -               | -                | -               | -               | -                | -                |
| i(1q)                 | 4     | 3 (75)          | -                | -               | -                | -                  | -                  | -               | -                  | -               | -                | -               | -               | -                | 1 (25)           |



| Structural aberration | Total | 9p22<br>No. (%) | 10p12<br>No. (%) | 6q27<br>No. (%) | 19p13<br>No. (%) | 19p13.1<br>No. (%) | 19p13.3<br>No. (%) | 1q21<br>No. (%) | 10p11.2<br>No. (%) | Xq24<br>No. (%) | 17q21<br>No. (%) | 4q21<br>No. (%) | 1p32<br>No. (%) | 17q12<br>No. (%) | Other<br>No. (%) |
|-----------------------|-------|-----------------|------------------|-----------------|------------------|--------------------|--------------------|-----------------|--------------------|-----------------|------------------|-----------------|-----------------|------------------|------------------|
| i(6p)                 | 1     | 1 (100)         | -                | -               | -                | -                  | -                  | -               | -                  | -               | -                | -               | -               | -                | -                |
| i(8q)                 | 9     | 5 (55.6)        | 2 (22.2)         | -               | -                | -                  | -                  | -               | 1 (11.1)           | -               | -                | -               | -               | -                | 1 (11.1)         |
| i(9q)                 | 1     | -               | 1 (100)          | -               | -                | -                  | -                  | -               | -                  | -               | -                | -               | -               | -                | -                |
| i(10q)                | 1     | -               | -                | -               | -                | 1 (100)            | -                  | -               | -                  | -               | -                | -               | -               | -                | -                |
| i(12q)                | 2     | 1 (50)          | 1 (50)           | -               | -                | -                  | -                  | -               | -                  | -               | -                | -               | -               | -                | -                |
| i(17q)                | 3     | 3 (100)         | -                | -               | -                | -                  | -                  | -               | -                  | -               | -                | -               | -               | -                | -                |
| i(Xq)                 | 2     | 2 (100)         | -                | -               | -                | -                  | -                  | -               | -                  | -               | -                | -               | -               | -                | -                |
| ins(3;14)(q;q)        | 1     | -               | 1 (100)          | -               | -                | -                  | -                  | -               | -                  | -               | -                | -               | -               | -                | -                |
| ins(17;11)(q;q)       | 1     | -               | 1 (100)          | -               | -                | -                  | -                  | -               | -                  | -               | -                | -               | -               | -                | -                |
| ins(20;11)(p;q)       | 1     | -               | -                | -               | -                | -                  | -                  | -               | -                  | 1 (100)         | -                | -               | -               | -                | -                |
| dup(1q)               | 4     | 2 (50)          | 1 (25)           | -               | -                | -                  | -                  | -               | -                  | -               | -                | -               | -               | -                | 1 (25)           |
| dup(1)(p;q)           | 1     | -               | 1 (100)          | -               | -                | -                  | -                  | -               | -                  | -               | -                | -               | -               | -                | -                |
| dup(5q)               | 1     | -               | -                | -               | -                | 1 (100)            | -                  | -               | -                  | -               | -                | -               | -               | -                | -                |
| dup(7p)               | 1     | -               | -                | -               | -                | 1 (100)            | -                  | -               | -                  | -               | -                | -               | -               | -                | -                |
| dic(1;8)(p;p)         | 1     | -               | -                | -               | -                | -                  | -                  | -               | -                  | -               | -                | -               | -               | -                | 1 (100)          |
| dic(1;11)(p;q)        | 1     | -               | -                | -               | -                | 1 (100)            | -                  | -               | -                  | -               | -                | -               | -               | -                | -                |
| dic(1;15)(p;p)        | 1     | 1 (100)         | -                | -               | -                | -                  | -                  | -               | -                  | -               | -                | -               | -               | -                | -                |
| dic(2;9)(q;p)         | 1     | 1 (100)         | -                | -               | -                | -                  | -                  | -               | -                  | -               | -                | -               | -               | -                | -                |
| dic(7;10)(p;p)        | 1     | -               | 1 (100)          | -               | -                | -                  | -                  | -               | -                  | -               | -                | -               | -               | -                | -                |
| dic(7;13)(p;q)        | 1     | 1 (100)         | -                | -               | -                | -                  | -                  | -               | -                  | -               | -                | -               | -               | -                | -                |
| dic(8?)               | 1     | -               | 1 (100)          | -               | -                | -                  | -                  | -               | -                  | -               | -                | -               | -               | -                | -                |
| dic(8;9)(p;p)         | 1     | 1 (100)         | -                | -               | -                | -                  | -                  | -               | -                  | -               | -                | -               | -               | -                | -                |
| dic(8;12)(p;p)        | 3     | -               | 2 (66.7)         | -               | -                | -                  | 1 (33.3)           | -               | -                  | -               | -                | -               | -               | -                | -                |
| dic(12;14)(p;p)       | 1     | -               | -                | -               | -                | -                  | -                  | -               | -                  | -               | -                | -               | -               | 1 (100)          | -                |
| dic(12;17)(p;p)       | 1     | -               | 1 (100)          | -               | -                | -                  | -                  | -               | -                  | -               | -                | -               | -               | -                | -                |
| idic(7p)              | 1     | -               | -                | -               | -                | -                  | -                  | 1 (100)         | -                  | -               | -                | -               | -               | -                | -                |
| inv(1)(p;q)           | 1     | 1 (100)         | -                | -               | -                | -                  | -                  | -               | -                  | -               | -                | -               | -               | -                | -                |
| inv(3q)               | 1     | 1 (100)         | -                | -               | -                | -                  | -                  | -               | -                  | -               | -                | -               | -               | -                | -                |
| inv(8q)               | 1     | -               | -                | -               | -                | -                  | -                  | -               | -                  | -               | -                | -               | -               | -                | 1 (100)          |
| inv(8)(p;q)           | 1     | -               | 1 (100)          | -               | -                | -                  | -                  | -               | -                  | -               | -                | -               | -               | -                | -                |
| inv(10)(p;q)          | 1     | -               | -                | -               | -                | -                  | -                  | -               | -                  | -               | -                | -               | -               | -                | 1 (100)          |
| inv(12)(p;q)          | 1     | -               | -                | -               | -                | -                  | -                  | -               | -                  | 1 (100)         | -                | -               | -               | -                | -                |
| inv(14q)              | 1     | -               | 1 (100)          | -               | -                | -                  | -                  | -               | -                  | -               | -                | -               | -               | -                | -                |
| inv(17)(p;q)          | 1     | -               | 1 (100)          | -               | -                | -                  | -                  | -               | -                  | -               | -                | -               | -               | -                | -                |
| inv(X)(p;q)           | 1     | -               | 1 (100)          | -               | -                | -                  | -                  | -               | -                  | -               | -                | -               | -               | -                | -                |
| r(7)(p;q)             | 1     | -               | -                | -               | -                | -                  | -                  | -               | -                  | -               | -                | -               | -               | -                | 1 (100)          |
| r(12)(p;q)            | 1     | 1 (100)         | -                | -               | -                | -                  | -                  | -               | -                  | -               | -                | -               | -               | -                | -                |
| trp(1q)               | 1     | -               | -                | -               | -                | -                  | -                  | -               | 1 (100)            | -               | -                | -               | -               | -                | -                |
| +del(1p)              | 2     | -               | 1 (50)           | -               | -                | 1 (50)             | -                  | -               | -                  | -               | -                | -               | -               | -                | -                |
| +del(9q)              | 1     | 1 (100)         | -                | -               | -                | -                  | -                  | -               | -                  | -               | -                | -               | -               | -                | -                |
| +del(12p)             | 1     | 1 (100)         | -                | -               | -                | -                  | -                  | -               | -                  | -               | -                | -               | -               | -                | -                |
| +der(1p)              | 3     | -               | -                | -               | -                | 1 (33.3)           | 1 (33.3)           | -               | -                  | -               | -                | -               | -               | -                | 1 (33.3)         |
| +der(1?)              | 1     | -               | -                | -               | -                | -                  | -                  | -               | -                  | -               | -                | 1 (100)         | -               | -                | -                |
| +der(1;2)(q;q)        | 1     | -               | 1 (100)          | -               | -                | -                  | -                  | -               | -                  | -               | -                | -               | -               | -                | -                |

| Structural aberration | Total | 9p22<br>No. (%) | 10p12<br>No. (%) | 6q27<br>No. (%) | 19p13<br>No. (%) | 19p13.1<br>No. (%) | 19p13.3<br>No. (%) | 1q21<br>No. (%) | 10p11.2<br>No. (%) | Xq24<br>No. (%) | 17q21<br>No. (%) | 4q21<br>No. (%) | 1p32<br>No. (%) | 17q12<br>No. (%) | Other<br>No. (%) |
|-----------------------|-------|-----------------|------------------|-----------------|------------------|--------------------|--------------------|-----------------|--------------------|-----------------|------------------|-----------------|-----------------|------------------|------------------|
| +der(1;5)(q;p)        | 1     | 1 (100)         | -                | -               | -                | -                  | -                  | -               | -                  | -               | -                | -               | -               | -                | -                |
| +der(1;5)(q;q)        | 1     | -               | 1 (100)          | -               | -                | -                  | -                  | -               | -                  | -               | -                | -               | -               | -                | -                |
| +der(1;13)(q;q)       | 1     | -               | 1 (100)          | -               | -                | -                  | -                  | -               | -                  | -               | -                | -               | -               | -                | -                |
| +der(1;16)(q;p)       | 1     | 1 (100)         | -                | -               | -                | -                  | -                  | -               | -                  | -               | -                | -               | -               | -                | -                |
| +der(4q)              | 3     | 1 (33.3)        | -                | -               | -                | -                  | -                  | -               | -                  | -               | -                | 2 (66.7)        | -               | -                | -                |
| +der(5q)              | 1     | 1 (100)         | -                | -               | -                | -                  | -                  | -               | -                  | -               | -                | -               | -               | -                | -                |
| +der(6q)              | 10    | -               | -                | 10 (100)        | -                | -                  | -                  | -               | -                  | -               | -                | -               | -               | -                | -                |
| +der(8p)              | 1     | -               | 1 (100)          | -               | -                | -                  | -                  | -               | -                  | -               | -                | -               | -               | -                | -                |
| +der(8q)*             | 1     | -               | -                | -               | -                | 1 (100)            | -                  | -               | -                  | -               | -                | -               | -               | -                | -                |
| +der(8pq)             | 1     | 1 (100)         | -                | -               | -                | -                  | -                  | -               | -                  | -               | -                | -               | -               | -                | -                |
| +der(9p)              | 17    | 17 (100)        | -                | -               | -                | -                  | -                  | -               | -                  | -               | -                | -               | -               | -                | -                |
| +der(10p)             | 1     | -               | 1 (100)          | -               | -                | -                  | -                  | -               | -                  | -               | -                | -               | -               | -                | -                |
| +der(10?)             | 1     | -               | 1 (100)          | -               | -                | -                  | -                  | -               | -                  | -               | -                | -               | -               | -                | -                |
| +der(11p)             | 1     | 1 (100)         | -                | -               | -                | -                  | -                  | -               | -                  | -               | -                | -               | -               | -                | -                |
| +der(11q)             | 2     | 2 (100)         | -                | -               | -                | -                  | -                  | -               | -                  | -               | -                | -               | -               | -                | -                |
| +der(17q)             | 1     | -               | -                | -               | -                | -                  | -                  | -               | -                  | -               | 1 (100)          | -               | -               | -                | -                |
| +der(18p)             | 1     | 1 (100)         | -                | -               | -                | -                  | -                  | -               | -                  | -               | -                | -               | -               | -                | -                |
| +der(19p)*            | 12    | 1 (8.3)         | -                | -               | 3 (25)           | 2 (16.7)           | 6 (50)             | -               | -                  | -               | -                | -               | -               | -                | -                |
| +der(19q)             | 1     | -               | -                | -               | -                | -                  | -                  | 1 (100)         | -                  | -               | -                | -               | -               | -                | -                |
| +der(20p)*            | 1     | -               | -                | -               | -                | -                  | -                  | -               | -                  | -               | -                | -               | -               | -                | 1 (100)          |
| +i(1q)                | 2     | -               | -                | -               | 1 (50)           | -                  | 1 (50)             | -               | -                  | -               | -                | -               | -               | -                | -                |
| +i(5p)                | 1     | -               | 1 (100)          | -               | -                | -                  | -                  | -               | -                  | -               | -                | -               | -               | -                | -                |
| +i(8q)*               | 5     | 2 (40)          | 1 (20)           | -               | -                | -                  | -                  | -               | -                  | -               | -                | -               | 1 (20)          | 1 (20)           | -                |
| +ins(8q)              | 1     | -               | -                | -               | -                | -                  | -                  | -               | -                  | -               | -                | -               | -               | -                | 1 (100)          |
| +ider(9p)             | 1     | 1 (100)         | -                | -               | -                | -                  | -                  | -               | -                  | -               | -                | -               | -               | -                | -                |
| +ider(19p)            | 1     | -               | -                | -               | -                | 1 (100)            | -                  | -               | -                  | -               | -                | -               | -               | -                | -                |
| +idic(1p)             | 1     | -               | 1 (100)          | -               | -                | -                  | -                  | -               | -                  | -               | -                | -               | -               | -                | -                |
| +r(?)                 | 1     | -               | -                | -               | -                | -                  | -                  | -               | -                  | -               | -                | -               | -               | -                | 1 (100)          |
| +neo(13q)             | 1     | -               | -                | -               | -                | 1 (100)            | -                  | -               | -                  | -               | -                | -               | -               | -                | -                |
| t(1;3)(p;q)           | 1     | 1 (100)         | -                | -               | -                | -                  | -                  | -               | -                  | -               | -                | -               | -               | -                | -                |
| t(1;4)(q;p)           | 1     | -               | -                | -               | -                | -                  | 1 (100)            | -               | -                  | -               | -                | -               | -               | -                | -                |
| t(1;4)(q;q)           | 1     | 1 (100)         | -                | -               | -                | -                  | -                  | -               | -                  | -               | -                | -               | -               | -                | -                |
| t(1;5)(p;p)           | 1     | -               | -                | -               | -                | -                  | -                  | -               | -                  | -               | -                | -               | -               | -                | 1 (100)          |
| t(1;6)(p;q)           | 1     | -               | -                | -               | -                | -                  | 1 (100)            | -               | -                  | -               | -                | -               | -               | -                | -                |
| t(1;7)(q;p)           | 1     | 1 (100)         | -                | -               | -                | -                  | -                  | -               | -                  | -               | -                | -               | -               | -                | -                |
| t(1;7)(q;q)           | 1     | -               | -                | -               | -                | -                  | -                  | -               | -                  | -               | -                | -               | 1 (100)         | -                | -                |
| t(1;10)(q;q)          | 1     | -               | 1 (100)          | -               | -                | -                  | -                  | -               | -                  | -               | -                | -               | -               | -                | -                |
| t(1;11)(q;q)          | 2     | 1 (50)          | 1 (50)           | -               | -                | -                  | -                  | -               | -                  | -               | -                | -               | -               | -                | -                |
| t(1;11)(q;p)          | 1     | 1 (100)         | -                | -               | -                | -                  | -                  | -               | -                  | -               | -                | -               | -               | -                | -                |
| t(1;12)(p;q)          | 1     | -               | -                | 1 (100)         | -                | -                  | -                  | -               | -                  | -               | -                | -               | -               | -                | -                |
| t(1;14)(q;q)          | 1     | 1 (100)         | -                | -               | -                | -                  | -                  | -               | -                  | -               | -                | -               | -               | -                | -                |
| t(1;19)(p;p)          | 1     | -               | -                | -               | -                | -                  | 1 (100)            | -               | -                  | -               | -                | -               | -               | -                | -                |
| t(2;9)(q;p)           | 1     | -               | -                | -               | -                | -                  | -                  | -               | -                  | -               | -                | -               | -               | -                | 1 (100)          |
| t(2;14)(q;q)          | 1     | 1 (100)         | -                | -               | -                | -                  | -                  | -               | -                  | -               | -                | -               | -               | -                | -                |

| Structural aberration | Total | 9p22<br>No. (%) | 10p12<br>No. (%) | 6q27<br>No. (%) | 19p13<br>No. (%) | 19p13.1<br>No. (%) | 19p13.3<br>No. (%) | 1q21<br>No. (%) | 10p11.2<br>No. (%) | Xq24<br>No. (%) | 17q21<br>No. (%) | 4q21<br>No. (%) | 1p32<br>No. (%) | 17q12<br>No. (%) | Other<br>No. (%) |
|-----------------------|-------|-----------------|------------------|-----------------|------------------|--------------------|--------------------|-----------------|--------------------|-----------------|------------------|-----------------|-----------------|------------------|------------------|
| t(3;4)(p;p)           | 1     | -               | 1 (100)          | -               | -                | -                  | -                  | -               | -                  | -               | -                | -               | -               | -                | -                |
| t(3;4)(q;q)           | 1     | -               | -                | -               | -                | 1 (100)            | -                  | -               | -                  | -               | -                | -               | -               | -                | -                |
| t(3;5)(q;q)           | 1     | -               | 1 (100)          | -               | -                | -                  | -                  | -               | -                  | -               | -                | -               | -               | -                | -                |
| t(3;9)(q;p)           | 1     | -               | -                | -               | -                | -                  | -                  | -               | -                  | -               | -                | -               | -               | -                | 1 (100)          |
| t(3;10)(p;p)          | 1     | 1 (100)         | -                | -               | -                | -                  | -                  | -               | -                  | -               | -                | -               | -               | -                | -                |
| t(3;20)(p;q)          | 1     | -               | -                | -               | -                | -                  | -                  | -               | -                  | -               | -                | -               | -               | -                | 1 (100)          |
| t(4;5)(q;q)           | 1     | -               | 1 (100)          | -               | -                | -                  | -                  | -               | -                  | -               | -                | -               | -               | -                | -                |
| t(4;9)(q;p)           | 1     | 1 (100)         | -                | -               | -                | -                  | -                  | -               | -                  | -               | -                | -               | -               | -                | -                |
| t(4;11)(q;q)          | 1     | 1 (100)         | -                | -               | -                | -                  | -                  | -               | -                  | -               | -                | -               | -               | -                | -                |
| t(5;7)(q;q)           | 1     | 1 (100)         | -                | -               | -                | -                  | -                  | -               | -                  | -               | -                | -               | -               | -                | -                |
| t(5;7)(q;p)           | 1     | -               | -                | -               | -                | -                  | -                  | -               | -                  | -               | -                | -               | -               | -                | 1 (100)          |
| t(5;9)(q;q)           | 1     | -               | -                | -               | -                | -                  | -                  | -               | -                  | -               | -                | -               | -               | -                | 1 (100)          |
| t(5;11)(q;q)          | 1     | -               | -                | -               | -                | -                  | 1 (100)            | -               | -                  | -               | -                | -               | -               | -                | -                |
| t(5;13)(q;q)          | 1     | 1 (100)         | -                | -               | -                | -                  | -                  | -               | -                  | -               | -                | -               | -               | -                | -                |
| t(5;17)(p;p)          | 1     | -               | -                | -               | -                | -                  | -                  | -               | -                  | -               | -                | -               | 1 (100)         | -                | -                |
| t(5;18)(q;p)          | 1     | -               | -                | 1 (100)         | -                | -                  | -                  | -               | -                  | -               | -                | -               | -               | -                | -                |
| t(6;12)(p;q)          | 1     | -               | 1 (100)          | -               | -                | -                  | -                  | -               | -                  | -               | -                | -               | -               | -                | -                |
| t(6;12)(q;p)          | 1     | -               | -                | -               | -                | -                  | -                  | 1 (100)         | -                  | -               | -                | -               | -               | -                | -                |
| t(6;12;9)(q;q;p)      | 1     | -               | -                | -               | -                | -                  | -                  | -               | -                  | -               | -                | -               | -               | -                | 1 (100)          |
| t(6;16)(p;q)          | 1     | -               | 1 (100)          | -               | -                | -                  | -                  | -               | -                  | -               | -                | -               | -               | -                | -                |
| t(6;17)(p;q)          | 1     | 1 (100)         | -                | -               | -                | -                  | -                  | -               | -                  | -               | -                | -               | -               | -                | -                |
| t(6;22)(p;q)          | 1     | 1 (100)         | -                | -               | -                | -                  | -                  | -               | -                  | -               | -                | -               | -               | -                | 1 (100)          |
| t(7;10)(q;q)          | 1     | -               | -                | -               | -                | -                  | -                  | -               | -                  | -               | -                | -               | -               | -                | 1 (100)          |
| t(7;10)(q;p)          | 1     | -               | -                | -               | -                | -                  | -                  | -               | -                  | -               | -                | -               | -               | -                | -                |
| t(7;11)(p;q)          | 1     | -               | 1 (100)          | -               | -                | -                  | -                  | -               | -                  | -               | -                | -               | -               | -                | -                |
| t(7;12)(p;q)          | 1     | -               | 1 (100)          | -               | -                | -                  | -                  | -               | -                  | -               | -                | -               | -               | -                | -                |
| t(7;16)(p;p)          | 1     | -               | -                | -               | -                | -                  | -                  | -               | -                  | -               | -                | -               | -               | 1 (100)          | -                |
| t(7;17)(p;q)          | 1     | -               | -                | 1 (100)         | -                | -                  | -                  | -               | -                  | -               | -                | -               | -               | -                | -                |
| t(7;20)(q;q)          | 1     | -               | -                | 1 (100)         | -                | -                  | -                  | -               | -                  | -               | -                | -               | -               | -                | -                |
| t(7;20)(p;q)          | 1     | 1 (100)         | -                | -               | -                | -                  | -                  | -               | -                  | -               | -                | -               | -               | -                | -                |
| t(8;9)(p;p)           | 1     | 1 (100)         | -                | -               | -                | -                  | -                  | -               | -                  | -               | -                | -               | -               | -                | -                |
| t(8;10)(q;p)          | 2     | -               | 1 (100)          | -               | -                | -                  | -                  | -               | -                  | -               | -                | -               | -               | -                | -                |
| t(8;15)(p;q)          | 1     | -               | -                | -               | -                | -                  | -                  | -               | -                  | -               | -                | -               | -               | -                | 1 (100)          |
| t(8;18)(p;p)          | 1     | -               | 1 (100)          | -               | -                | -                  | -                  | -               | -                  | -               | -                | -               | -               | -                | -                |
| t(9;10)(p;q)          | 1     | -               | -                | -               | -                | -                  | -                  | -               | -                  | -               | -                | -               | -               | -                | 1 (100)          |
| t(9;11)(q;q)          | 1     | -               | 1 (100)          | -               | -                | -                  | -                  | -               | -                  | -               | -                | -               | -               | -                | -                |
| t(9;13)(q;q)          | 2     | -               | -                | -               | 2 (100)          | -                  | -                  | -               | -                  | -               | -                | -               | -               | -                | -                |
| t(9;14)(p;q)          | 1     | -               | 1 (100)          | -               | -                | -                  | -                  | -               | -                  | -               | -                | -               | -               | -                | -                |
| t(9;17)(p;q)          | 1     | 1 (100)         | -                | -               | -                | -                  | -                  | -               | -                  | -               | -                | -               | -               | -                | -                |
| t(10;12)(q;p)         | 1     | -               | 1 (100)          | -               | -                | -                  | -                  | -               | -                  | -               | -                | -               | -               | -                | -                |
| t(10;15)(q;q)         | 1     | -               | 1 (100)          | -               | -                | -                  | -                  | -               | -                  | -               | -                | -               | -               | -                | -                |
| t(11;14)(q;p)         | 1     | -               | 1 (100)          | -               | -                | -                  | -                  | -               | -                  | -               | -                | -               | -               | -                | -                |
| t(11;14)(q;q)         | 2     | 1 (50)          | 1 (50)           | -               | -                | -                  | -                  | -               | -                  | -               | -                | -               | -               | -                | -                |
| t(11;20)(q;q)         | 1     | 1 (100)         | -                | -               | -                | -                  | -                  | -               | -                  | -               | -                | -               | -               | -                | -                |

| Structural aberration | Total | 9p22<br>No. (%) | 10p12<br>No. (%) | 6q27<br>No. (%) | 19p13<br>No. (%) | 19p13.1<br>No. (%) | 19p13.3<br>No. (%) | 1q21<br>No. (%) | 10p11.2<br>No. (%) | Xq24<br>No. (%) | 17q21<br>No. (%) | 4q21<br>No. (%) | 1p32<br>No. (%) | 17q12<br>No. (%) | Other<br>No. (%) |
|-----------------------|-------|-----------------|------------------|-----------------|------------------|--------------------|--------------------|-----------------|--------------------|-----------------|------------------|-----------------|-----------------|------------------|------------------|
| t(12;14)(p;q)         | 1     | -               | 1 (100)          | -               | -                | -                  | -                  | -               | -                  | -               | -                | -               | -               | -                | -                |
| t(12;17)(q;q)         | 2     | -               | 1 (50)           | -               | -                | -                  | -                  | -               | -                  | -               | -                | -               | -               | -                | 1 (50)           |
| t(12;18)(q;p)         | 1     | -               | 1 (100)          | -               | -                | -                  | -                  | -               | -                  | -               | -                | -               | -               | -                | -                |
| t(12;19)(q;q)         | 1     | -               | -                | -               | -                | -                  | 1 (100)            | -               | -                  | -               | -                | -               | -               | -                | -                |
| t(13;16;17)(q;p;q)    | 1     | -               | 1 (100)          | -               | -                | -                  | -                  | -               | -                  | -               | -                | -               | -               | -                | -                |
| t(13;17)(q;q)         | 1     | 1 (100)         | -                | -               | -                | -                  | -                  | -               | -                  | -               | -                | -               | -               | -                | -                |
| t(14;14)(q;q)         | 1     | -               | 1 (100)          | -               | -                | -                  | -                  | -               | -                  | -               | -                | -               | -               | -                | -                |
| t(14;21)(p;q)         | 1     | -               | 1 (100)          | -               | -                | -                  | -                  | -               | -                  | -               | -                | -               | -               | -                | -                |
| t(15;16)(q;p)         | 1     | 1 (100)         | -                | -               | -                | -                  | -                  | -               | -                  | -               | -                | -               | -               | -                | -                |
| t(15;19)(q;q)         | 1     | -               | -                | -               | -                | -                  | -                  | -               | -                  | -               | -                | -               | -               | -                | 1 (100)          |
| t(15;22)(q;q)         | 1     | 1 (100)         | -                | -               | -                | -                  | -                  | -               | -                  | -               | -                | -               | -               | -                | -                |
| t(X;2)(q;q)           | 1     | 1 (100)         | -                | -               | -                | -                  | -                  | -               | -                  | -               | -                | -               | -               | -                | -                |
| t(X;4)(q;q)           | 1     | -               | 1 (100)          | -               | -                | -                  | -                  | -               | -                  | -               | -                | -               | -               | -                | -                |
| t(X;5)(p;q)           | 1     | -               | -                | -               | -                | -                  | -                  | -               | -                  | -               | -                | -               | -               | -                | 1 (100)          |
| t(X;16)(q;q)          | 1     | -               | -                | -               | -                | -                  | 1 (100)            | -               | -                  | -               | -                | -               | -               | -                | -                |
| t(Y;20)(q;q)          | 1     | -               | -                | -               | -                | -                  | -                  | -               | -                  | -               | -                | -               | -               | -                | 1 (100)          |

Highlighted in green are the recurring structural ACAs (i.e., occurring in at least 10 patients). 9p22 refers to *KMT2A::MLLT3*/t(9;11)(p22;q23), 10p12 to *KMT2A::MLLT10*/t(10;11)(p12;q23), 6q27 to *KMT2A::AFDN*/t(6;11)(q27;q23), 19p13 to t(11;19)(q23;p13)-without ascertained sub-band, 19p13.1 to *KMT2A::ELL*/t(11;19)(q23;p13.1), 19p13.3 to *KMT2A::MLLT1*/t(11;19)(q23;p13.3), 1q21 to *KMT2A::MLLT11*/t(1;11)(q21;q23), 10p11.2 to *KMT2A::AB11*/t(10;11)(p11.2;q23), Xq24 to *KMT2A::SEPT6*/t(X;11)(q24;q23), 17q21 to t(11;17)(q23;q21), 4q21 to *KMT2A::AFF1*/t(4;11)(q21;q23), 1p32 to *KMT2A::EPS15*/t(1;11)(p32;q23), and 17q12 to t(11;17)(q23;q12).

No., number of patients.

\*One patient had both del(1p) and del(1q), one patient had two copies of del(8p), one patient had two copies of del(8q), one patient had both del(9p) and del(9q), one patient had two copies of der(5q), one patient had two copies of der(11q), one patient had two copies of der(13p), one patient had two copies of der(22q), one patient had two additional copies of der(8q), one patient had two additional copies of der(19q), one patient had two additional copies of der(20p), and two patients had two additional copies of i(8q).

**Supplementary Table S5.** Univariable Cox regression analyses of event-free survival, cumulative incidence of relapse, and overall survival in childhood *KMT2A*-rearranged acute myeloid leukemia

|                                       | pEFS   |     |         |       | pCIR   |     |         |       | pOS    |     |         |       |
|---------------------------------------|--------|-----|---------|-------|--------|-----|---------|-------|--------|-----|---------|-------|
|                                       | No.    | HR  | 95% CI  | P     | No.    | HR  | 95% CI  | P     | No.    | HR  | 95% CI  | P     |
| Age at diagnosis, years               |        |     |         |       |        |     |         |       |        |     |         |       |
| ≤10                                   | 901    | 1.0 |         |       | 784    | 1.0 |         |       | 916    | 1.0 |         |       |
| >10                                   | 298    | 1.2 | 1.0-1.4 | 0.03  | 273    | 1.3 | 1.0-1.6 | 0.02  | 301    | 1.6 | 1.3-2.0 | <0.01 |
| WBC count, x10 <sup>9</sup> /L        |        |     |         |       |        |     |         |       |        |     |         |       |
| ≤100                                  | 900    | 1.0 |         |       | 814    | 1.0 |         |       | 911    | 1.0 |         |       |
| >100                                  | 257    | 1.3 | 1.1-1.5 | 0.01  | 203    | 1.1 | 0.9-1.4 | 0.39  | 263    | 1.4 | 1.1-1.7 | <0.01 |
| CNS involvement                       |        |     |         |       |        |     |         |       |        |     |         |       |
| No                                    | 571    | 1.0 |         |       | 527    | 1.0 |         |       | 572    | 1.0 |         |       |
| Yes                                   | 147    | 1.3 | 1.0-1.6 | 0.09  | 121    | 1.0 | 0.7-1.4 | 0.87  | 147    | 1.3 | 0.9-1.7 | 0.17  |
| Fusion-based group                    |        |     |         |       |        |     |         |       |        |     |         |       |
| 9p22/ <i>KMT2A</i> :: <i>MLLT3</i>    | 512    | 1.0 |         |       | 459    | 1.0 |         |       | 522    | 1.0 |         |       |
| Xq24/ <i>KMT2A</i> :: <i>SEPT6</i>    | 21     | 0.4 | 0.2-1.1 | 0.07  | 21     | 0.5 | 0.2-1.3 | 0.15  | 21     | 0.3 | 0.1-1.2 | 0.08  |
| 1p32/ <i>KMT2A</i> :: <i>EPS15</i>    | 12     | 0.5 | 0.2-1.6 | 0.24  | 10     | 0.2 | 0-1.7   | 0.15  | 13     | 0.2 | 0.0-1.7 | 0.15  |
| 17q21                                 | 12     | 0.7 | 0.3-1.9 | 0.52  | 11     | 0.2 | 0-1.8   | 0.16  | 13     | 1.1 | 0.4-2.8 | 0.93  |
| 17q12                                 | 10     | 1.0 | 0.4-2.7 | 0.99  | 9      | 1.1 | 0.4-3.5 | 0.86  | 10     | 1.7 | 0.6-4.5 | 0.32  |
| 1q21/ <i>KMT2A</i> :: <i>MLLT11</i>   | 27     | 1.0 | 0.6-1.8 | 0.94  | 22     | 0.7 | 0.3-1.6 | 0.37  | 27     | 0.9 | 0.4-1.9 | 0.73  |
| 19p13.1/ <i>KMT2A</i> :: <i>ELL</i>   | 71     | 1.3 | 0.9-1.8 | 0.15  | 61     | 1.2 | 0.8-1.9 | 0.30  | 72     | 1.1 | 0.7-1.7 | 0.73  |
| 19p13                                 | 20     | 1.4 | 0.8-2.4 | 0.32  | 19     | 1.3 | 0.6-2.6 | 0.48  | 20     | 1.4 | 0.7-2.9 | 0.34  |
| 19p13.3/ <i>KMT2A</i> :: <i>MLLT1</i> | 55     | 1.6 | 1.1-2.3 | 0.01  | 50     | 1.8 | 1.2-2.7 | <0.01 | 55     | 1.6 | 1.1-2.5 | 0.03  |
| 10p12/ <i>KMT2A</i> :: <i>MLLT10</i>  | 212    | 1.7 | 1.4-2.1 | <0.01 | 186    | 1.9 | 1.5-2.4 | <0.01 | 214    | 1.7 | 1.3-2.2 | <0.01 |
| 4q21/ <i>KMT2A</i> :: <i>AFF1</i>     | 12     | 2.7 | 1.4-5.2 | <0.01 | 6      | 1.5 | 0.5-4.6 | 0.51  | 12     | 4.4 | 2.2-8.6 | <0.01 |
| 6q27/ <i>KMT2A</i> :: <i>AFDN</i>     | 89     | 2.0 | 1.5-2.7 | <0.01 | 77     | 2.3 | 1.7-3.1 | <0.01 | 90     | 2.2 | 1.6-3.0 | <0.01 |
| 10p11.2/ <i>KMT2A</i> :: <i>ABII</i>  | 24     | 2.5 | 1.6-4.1 | <0.01 | 22     | 3.5 | 2.1-5.9 | <0.01 | 24     | 1.9 | 1.0-3.5 | 0.04  |
| Other                                 | 122    | 1.5 | 1.1-1.9 | <0.01 | 104    | 1.6 | 1.1-2.1 | <0.01 | 124    | 1.4 | 1.0-2.0 | 0.04  |
| ACA                                   |        |     |         |       |        |     |         |       |        |     |         |       |
| No                                    | 614    | 1.0 |         |       | 549    | 1.0 |         |       | 621    | 1.0 |         |       |
| Yes                                   | 540    | 1.2 | 1.0-1.4 | 0.03  | 464    | 1.1 | 0.9-1.4 | 0.20  | 544    | 1.5 | 1.2-1.8 | <0.01 |
| ACA type                              |        |     |         |       |        |     |         |       |        |     |         |       |
| No ACA                                | 614    | 1.0 |         |       | 549    | 1.0 |         |       | 621    | 1.0 |         |       |
| Structural                            | 155    | 1.5 | 1.2-1.8 | <0.01 | 133    | 1.5 | 1.2-2.0 | <0.01 | 155    | 1.6 | 1.2-2.1 | <0.01 |
| Numerical                             | 205    | 0.9 | 0.7-1.1 | 0.25  | 183    | 0.8 | 0.6-1.0 | 0.06  | 207    | 1.1 | 0.9-1.5 | 0.36  |
| Both                                  | 180    | 1.4 | 1.1-1.7 | <0.01 | 148    | 1.3 | 1.0-1.7 | 0.03  | 182    | 1.9 | 1.4-2.4 | <0.01 |
| Recurring ACAs*                       | Yes/No |     |         |       | Yes/No |     |         |       | Yes/No |     |         |       |
| Monosomy 7                            | 13/527 | 0.9 | 0.4-1.9 | 0.81  | 11/453 | 0.5 | 0.2-1.7 | 0.29  | 13/531 | 1.1 | 0.5-2.5 | 0.81  |
| Monosomy 10                           | 13/527 | 2.4 | 1.3-4.3 | <0.01 | 10/454 | 3.1 | 1.5-6.3 | <0.01 | 13/531 | 2.9 | 1.5-5.5 | <0.01 |
| Trisomy 1                             | 13/527 | 1.7 | 0.9-3.2 | 0.10  | 10/454 | 1.9 | 0.9-4   | 0.10  | 13/531 | 2.7 | 1.4-5.0 | <0.01 |
| Trisomy 3                             | 16/524 | 1.5 | 0.8-2.7 | 0.19  | 10/454 | 1.1 | 0.4-2.6 | 0.91  | 16/528 | 1.6 | 0.8-3.2 | 0.15  |
| Trisomy 4                             | 23/517 | 2.1 | 1.3-3.3 | <0.01 | 17/447 | 2.3 | 1.3-4.1 | <0.01 | 23/521 | 1.9 | 1.1-3.2 | 0.02  |
| Trisomy 6                             | 61/479 | 1.5 | 1.1-2.1 | 0.01  | 47/417 | 1.6 | 1.1-2.4 | 0.02  | 61/483 | 1.5 | 1.0-2.2 | 0.04  |
| Trisomy 7                             | 9/531  | 1.6 | 0.7-3.7 | 0.24  | 4/460  | 0.4 | 0.1-3.2 | 0.42  | 9/535  | 1.1 | 0.4-3.0 | 0.81  |

|            |         |     |         |                 |         |     |         |                 |         |     |         |                 |
|------------|---------|-----|---------|-----------------|---------|-----|---------|-----------------|---------|-----|---------|-----------------|
| Trisomy 8  | 198/342 | 0.7 | 0.6-0.9 | <b>&lt;0.01</b> | 172/292 | 0.7 | 0.5-0.9 | <b>&lt;0.01</b> | 200/344 | 0.7 | 0.5-0.9 | <b>0.01</b>     |
| Trisomy 9  | 17/523  | 1.0 | 0.5-1.9 | 0.96            | 15/449  | 1.0 | 0.5-2.1 | 0.98            | 17/527  | 0.9 | 0.4-1.9 | 0.82            |
| Trisomy 12 | 14/526  | 2.1 | 1.1-3.8 | 0.02            | 11/453  | 2.6 | 1.3-5.3 | <b>&lt;0.01</b> | 14/530  | 2.0 | 1.0-4.0 | 0.04            |
| Trisomy 13 | 17/523  | 1.4 | 0.8-2.5 | 0.30            | 12/452  | 1.2 | 0.5-2.6 | 0.70            | 17/527  | 1.5 | 0.8-3.0 | 0.21            |
| Trisomy 14 | 11/529  | 1.4 | 0.7-2.8 | 0.34            | 10/454  | 1.9 | 0.9-4.0 | 0.10            | 11/533  | 1.2 | 0.5-3.0 | 0.66            |
| Trisomy 16 | 12/528  | 2.8 | 1.5-5.1 | <b>&lt;0.01</b> | 9/455   | 3.8 | 1.9-7.8 | <b>&lt;0.01</b> | 12/532  | 2.0 | 0.9-4.2 | 0.08            |
| Trisomy 17 | 8/532   | 2.2 | 1.1-4.7 | 0.04            | 6/458   | 2.7 | 1.1-6.6 | 0.03            | 8/536   | 2.4 | 1.1-5.4 | 0.03            |
| Trisomy 18 | 21/519  | 1.4 | 0.8-2.4 | 0.28            | 17/447  | 1.7 | 0.9-3.2 | 0.11            | 21/523  | 1.6 | 0.9-3.0 | 0.12            |
| Trisomy 19 | 78/462  | 1.1 | 0.8-1.5 | 0.41            | 65/399  | 1.2 | 0.8-1.7 | 0.30            | 78/466  | 1.2 | 0.8-1.7 | 0.34            |
| Trisomy 20 | 24/516  | 1.3 | 0.8-2.2 | 0.24            | 21/443  | 1.6 | 0.9-2.7 | 0.13            | 24/520  | 1.3 | 0.7-2.3 | 0.38            |
| Trisomy 21 | 47/493  | 1.3 | 0.9-1.9 | 0.17            | 40/424  | 1.3 | 0.8-2.1 | 0.21            | 47/497  | 1.5 | 1.0-2.3 | 0.06            |
| Trisomy 22 | 24/516  | 1.4 | 0.9-2.3 | 0.17            | 19/445  | 1.5 | 0.9-2.7 | 0.15            | 24/520  | 1.4 | 0.8-2.5 | 0.20            |
| Trisomy X  | 13/527  | 2.6 | 1.4-4.8 | <b>&lt;0.01</b> | 7/457   | 2.3 | 0.9-5.5 | 0.07            | 13/531  | 2.1 | 1.1-4.3 | 0.04            |
| add(1p)    | 13/527  | 1.3 | 0.7-2.6 | 0.40            | 10/454  | 1.3 | 0.6-3.0 | 0.49            | 13/531  | 1.2 | 0.5-2.7 | 0.66            |
| add(12p)   | 13/527  | 2.4 | 1.4-4.3 | <b>&lt;0.01</b> | 9/455   | 2.4 | 1.1-5.1 | 0.02            | 13/531  | 1.5 | 0.7-3.2 | 0.29            |
| del(1p)    | 10/530  | 0.7 | 0.2-1.7 | 0.39            | 8/456   | 0.5 | 0.1-1.9 | 0.29            | 10/534  | 0.7 | 0.2-2.1 | 0.51            |
| del(9q)    | 16/524  | 2.0 | 1.2-3.5 | <b>0.01</b>     | 14/450  | 2.6 | 1.4-5   | <b>&lt;0.01</b> | 16/528  | 2.5 | 1.4-4.5 | <b>&lt;0.01</b> |
| del(13q)   | 9/531   | 1.1 | 0.4-2.5 | 0.92            | 9/455   | 1.6 | 0.7-3.9 | 0.31            | 9/535   | 0.5 | 0.1-2.0 | 0.32            |
| +der(6q)   | 10/530  | 1.8 | 0.9-3.6 | 0.11            | 8/456   | 1.8 | 0.7-4.3 | 0.21            | 10/534  | 1.6 | 0.7-3.7 | 0.23            |
| +der(9p)   | 16/524  | 0.9 | 0.5-1.8 | 0.84            | 13/451  | 0.9 | 0.4-2   | 0.79            | 16/528  | 1.1 | 0.5-2.2 | 0.90            |
| +der(19p)  | 10/530  | 1.0 | 0.4-2.2 | 0.95            | 8/456   | 0.5 | 0.1-1.9 | 0.28            | 10/534  | 0.9 | 0.3-2.4 | 0.80            |

Values in bold indicate statistical significance. 9p22/*KMT2A::MLLT3* refers to t(9;11)(p22;q23), 10p12/*KMT2A::MLLT10* to t(10;11)(p12;q23), 6q27/*KMT2A::AFDN* to t(6;11)(q27;q23), 19p13 to t(11;19)(q23;p13)-without ascertained sub-band, 19p13.1/*KMT2A::ELL* to t(11;19)(q23;p13.1), 19p13.3/*KMT2A::MLLT1* to t(11;19)(q23;p13.3), 1q21/*KMT2A::MLLT11* to t(1;11)(q21;q23), 10p11.2/*KMT2A::ABII* to t(10;11)(p11.2;q23), Xq24/*KMT2A::SEPT6* to t(X;11)(q24;q23), 17q21 to t(11;17)(q23;q21), 4q21/*KMT2A::AFF1* to t(4;11)(q21;q23), 1p32/*KMT2A::EPS15* to t(1;11)(p32;q23), and 17q12 to t(11;17)(q23;q12).

ACA, additional cytogenetic aberrations; CI, confidence interval; CNS, central nervous system; HR, hazard ratio; No., number of patients; pCIR, probabilities of cumulative incidence of relapse; pEFS, probabilities of event-free survival; pOS, probabilities of overall survival; WBC, white blood cell count.

\*Patients with specific ACAs are compared with patients with other ACAs.

**Supplementary Table S6.** Presence and type of additional cytogenetic aberrations by clinical characteristics

|                                 | No.   | ACAs             |                 | P               | Type of ACA       |                    |                 | P    |
|---------------------------------|-------|------------------|-----------------|-----------------|-------------------|--------------------|-----------------|------|
|                                 |       | Absent No. (%)   | Present No. (%) |                 | Numerical No. (%) | Structural No. (%) | Both* No. (%)   |      |
| Sex, No. (%)                    |       |                  |                 |                 |                   |                    |                 |      |
| Male                            | 611   | 324 (53.0)       | 287 (47.0)      | 0.87            | 110 (38.3)        | 82 (28.6)          | 95 (33.1)       | 0.90 |
| Female                          | 570   | 305 (53.5)       | 265 (46.5)      |                 | 97 (36.6)         | 76 (28.7)          | 92 (34.7)       |      |
| Age at diagnosis, years         |       |                  |                 |                 |                   |                    |                 |      |
| Median (IQR)                    | 1,200 | 2.3 (0.8-9.9)    | 3.0 (1.1-10.0)  | 0.06            | 3.9 (1.3-12.1)    | 1.9 (1.0-8.4)      | 2.6 (1.1-9.2)   | 0.01 |
| WBC count, x 10 <sup>9</sup> /L |       |                  |                 |                 |                   |                    |                 |      |
| Median (IQR)                    | 1,134 | 35.8 (7.0-110.0) | 13.7 (5.0-54.6) | <b>&lt;0.01</b> | 13.4 (4.9-60.9)   | 19.7 (5.5-54.3)    | 12.3 (5.0-51.9) | 0.39 |
| CNS involvement, No. (%)        |       |                  |                 |                 |                   |                    |                 |      |
| Negative                        | 543   | 282 (51.9)       | 261 (48.1)      | 0.91            | 113 (43.3)        | 72 (27.6)          | 76 (29.1)       | 0.57 |
| Positive                        | 142   | 73 (51.4)        | 69 (48.6)       |                 | 25 (36.2)         | 21 (30.4)          | 23 (33.3)       |      |
| FAB-type, No. (%)               |       |                  |                 | <b>&lt;0.01</b> |                   |                    |                 | 0.23 |
| FAB-M0                          | 17    | 4 (23.5)         | 13 (76.5)       |                 | 3 (23.1)          | 5 (38.5)           | 5 (38.5)        |      |
| FAB-M1                          | 30    | 18 (60.0)        | 12 (40)         |                 | 5 (41.7)          | 4 (33.3)           | 3 (25)          |      |
| FAB-M2                          | 17    | 12 (70.6)        | 5 (29.4)        |                 | 3 (60)            | 2 (40)             | 0 (0)           |      |
| FAB-M4                          | 115   | 81 (70.4)        | 34 (29.6)       |                 | 16 (47.1)         | 7 (20.6)           | 11 (32.4)       |      |
| FAB-M5                          | 584   | 308 (52.7)       | 276 (47.3)      |                 | 108 (39.1)        | 87 (31.5)          | 81 (29.3)       |      |
| FAB-M7                          | 29    | 2 (6.9)          | 27 (93.1)       |                 | 15 (55.6)         | 1 (3.7)            | 11 (40.7)       |      |
| FAB unspecified                 | 23    | 11 (47.8)        | 12 (52.2)       |                 | 4 (33.3)          | 3 (25)             | 5 (41.7)        |      |

Values in bold indicate statistical significance.

ACA, additional cytogenetic aberration; CNS, central nervous system; FAB, French-American-British; IQR, interquartile range; No., number of patients; WBC, white blood cell count.

\*Including patients who had separate numerical and structural aberrations, as well as patients with gain of a chromosome with a structural aberration (e.g., +der(9p), +i(8q)).

**Supplementary Table S7.** Survival estimates of children with *KMT2A*-rearranged acute myeloid leukemia

|                                             | 5-year pEFS |                   |           |          | 5-year pCIR |                   |           |          | 5-year pOS |      |           |          |
|---------------------------------------------|-------------|-------------------|-----------|----------|-------------|-------------------|-----------|----------|------------|------|-----------|----------|
|                                             | No.         | %                 | 95% CI    | <i>P</i> | No.         | %                 | 95% CI    | <i>P</i> | No.        | %    | 95% CI    | <i>P</i> |
| ACA                                         |             |                   |           | 0.03     |             |                   |           | 0.25     |            |      |           | <0.01    |
| No                                          | 614         | 47.4              | 43.3-51.5 |          | 549         | 43.2              | 38.9-47.4 |          | 621        | 67.9 | 64.2-71.6 |          |
| Yes                                         | 540         | 41.8              | 37.5-46.1 |          | 464         | 46.5              | 41.7-51.1 |          | 544        | 56.8 | 52.5-61.1 |          |
| ACA type                                    |             |                   |           | <0.01    |             |                   |           | <0.01    |            |      |           | <0.01    |
| Structural                                  | 155         | 33.7              | 25.9-41.5 |          | 133         | 57.0              | 47.5-65.4 |          | 155        | 53.9 | 47.7-62.1 |          |
| Numerical                                   | 205         | 52.0              | 44.9-59.1 |          | 183         | 34.5              | 27.5-41.6 |          | 207        | 64.0 | 57.1-70.9 |          |
| Both                                        | 180         | 37.3              | 30.1-44.6 |          | 148         | 51.7              | 43.2-59.6 |          | 182        | 50.8 | 43.0-58.6 |          |
| <b>9p22/<i>KMT2A</i>::<i>MLL3</i> group</b> |             |                   |           |          |             |                   |           |          |            |      |           |          |
| FAB-type                                    |             |                   |           | <0.01    |             |                   |           | <0.01    |            |      |           | <0.01    |
| Non-M5                                      | 81          | 37.9              | 26.9-48.9 |          | 70          | 48.6              | 35.9-60.1 |          | 84         | 52.3 | 42.0-63.5 |          |
| M5                                          | 298         | 65.9              | 60.2-71.6 |          | 274         | 24.5              | 19.4-29.9 |          | 305        | 80.3 | 75.6-85.0 |          |
| Trisomy 6*                                  |             |                   |           | <0.01    |             |                   |           | 0.02     |            |      |           | <0.01    |
| No                                          | 208         | 55.1              | 48.2-62.0 |          | 188         | 35.1              | 28.1-42.1 |          | 208        | 68.4 | 61.7-75.1 |          |
| Yes                                         | 27          | 19.4              | 2.0-36.8  |          | 19          | 72.4              | 37.1-90.0 |          | 27         | 39.8 | 19.6-60.0 |          |
| FAB-type – Trisomy 6                        |             |                   |           | <0.01    |             |                   |           | <0.01    |            |      |           | <0.01    |
| FAB-M5/No trisomy 6                         | 273         | 68.3              | 62.6-74.0 |          | 253         | 23.4              | 18.3-29.0 |          | 278        | 82.1 | 77.4-86.8 |          |
| FAB-M5/Trisomy 6                            | 11          | 29.1 <sup>†</sup> | 0-59.9    |          | 7           | 54.3 <sup>†</sup> | 5.2-88.1  |          | 11         | 47.7 | 13.2-82.2 |          |
| Non-FAB-M5/No trisomy 6                     | 66          | 39.1              | 26.8-51.5 |          | 55          | 43.5              | 29.5-56.6 |          | 66         | 55.6 | 43.1-68.1 |          |
| Non-FAB-M5/Trisomy 6                        | 10          | 26.7              | 0-56.1    |          | 10          | 73.3              | 24.8-93.3 |          | 10         | 32.0 | 0-65.3    |          |
| Flow-MRD at EO12                            |             |                   |           | 0.02     |             |                   |           | 0.39     |            |      |           | <0.01    |
| Negative                                    | 198         | 54.2              | 47.1-61.3 |          | 191         | 40.3              | 33.3-47.4 |          | 198        | 73.6 | 67.3-79.9 |          |
| Positive                                    | 17          | 35.3              | 12.6-58.0 |          | 12          | 50.0              | 19.2-74.8 |          | 17         | 47.1 | 23.4-70.8 |          |
| FAB-type – Flow-MRD at EO12                 |             |                   |           |          |             |                   |           |          |            |      |           |          |
| FAB-M5/MRD-negative                         | 85          | 67.2              | 57.0-77.4 | 0.21     | 82          | 28.4              | 18.2-38.6 | 0.60     | 85         | 82.7 | 74.5-90.9 | 0.05     |
| FAB-M5/MRD-positive                         | 10          | 50.0              | 19.0-81.0 |          | 8           | 37.5              | 4.0-71.0  |          | 10         | 60.0 | 29.6-90.4 |          |
| Non-FAB-M5/MRD-negative                     | 30          | 45.8              | 27.6-64.0 | 0.08     | 28          | 40.9              | 22.3-59.5 | 0.54     | 30         | 66.0 | 48.8-83.3 | 0.44     |
| Non-FAB-M5/MRD-positive                     | 4           | 25.0              | 0-67.5    |          | 2           | 50.0              | 0-100     |          | 4          | 50.0 | 1.0-99.0  |          |

Values in bold indicate statistical significance. 9p22/*KMT2A*::*MLL3* refers to t(9;11)(p22;q23). In analyses concerning the 9p22/*KMT2A*::*MLL3* group, two-sided *P*-values ≤ 0.05 were considered statistically significant.

ACA, additional cytogenetic aberrations; CI, confidence interval; EO12, end of induction 2; flow-MRD, flow cytometry-based measurable residual disease; No., number of patients; pCIR, probabilities of cumulative incidence of relapse; pEFS, probabilities of event-free survival; pOS, probabilities of overall survival.

\*Patients with trisomy 6 are compared with patients with other ACAs.

<sup>†</sup>For patients with FAB-M5 morphology and trisomy 6, the 3-year pEFS and pCIR are shown because these estimates could not be extrapolated to 5 years.



**Supplementary Table S8.** Univariable and multivariable Cox regression analyses of event-free survival, cumulative incidence of relapse, and overall survival in children with 9p22/*KMT2A::MLLT3* acute myeloid leukemia

| Univariable analyses                  | pEFS |     |         |                 | pCIR |     |         |                 | pOS |     |          |                 |
|---------------------------------------|------|-----|---------|-----------------|------|-----|---------|-----------------|-----|-----|----------|-----------------|
|                                       | No.  | HR  | 95% CI  | P               | No.  | HR  | 95% CI  | P               | No. | HR  | 95% CI   | P               |
| Age at diagnosis, years               |      |     |         |                 |      |     |         |                 |     |     |          |                 |
| ≤10                                   | 396  | 1.0 |         |                 | 353  | 1.0 |         |                 | 405 | 1.0 |          |                 |
| >10                                   | 116  | 0.9 | 0.7-1.2 | 0.52            | 106  | 0.9 | 0.6-1.3 | 0.41            | 117 | 1.3 | 0.9-1.9  | 0.16            |
| WBC count, x10 <sup>9</sup> /L        |      |     |         |                 |      |     |         |                 |     |     |          |                 |
| ≤100                                  | 394  | 1.0 |         |                 | 365  | 1.0 |         |                 | 401 | 1.0 |          |                 |
| >100                                  | 104  | 1.4 | 1.0-1.9 | <b>0.05</b>     | 81   | 1.1 | 0.7-1.6 | 0.76            | 107 | 1.4 | 0.9-2.0  | 0.10            |
| CNS involvement                       |      |     |         |                 |      |     |         |                 |     |     |          |                 |
| No                                    | 274  | 1.0 |         |                 | 253  | 1.0 |         |                 | 274 | 1.0 |          |                 |
| Yes                                   | 54   | 1.2 | 0.8-1.9 | 0.37            | 49   | 1.1 | 0.6-2.0 | 0.70            | 54  | 0.6 | 0.3-1.2  | 0.17            |
| FAB-type                              |      |     |         |                 |      |     |         |                 |     |     |          |                 |
| Non-M5                                | 81   | 1.0 |         |                 | 70   | 1.0 |         |                 | 84  | 1.0 |          |                 |
| M5                                    | 298  | 0.4 | 0.3-0.6 | <b>&lt;0.01</b> | 274  | 0.4 | 0.3-0.6 | <b>&lt;0.01</b> | 305 | 0.4 | 0.3-0.6  | <b>&lt;0.01</b> |
| ACA                                   |      |     |         |                 |      |     |         |                 |     |     |          |                 |
| No                                    | 258  | 1.0 |         |                 | 233  | 1.0 |         |                 | 263 | 1.0 |          |                 |
| Yes                                   | 235  | 1.2 | 0.9-1.6 | 0.13            | 207  | 1.2 | 0.9-1.6 | 0.32            | 235 | 1.6 | 1.1-2.2  | <b>&lt;0.01</b> |
| ACA type                              |      |     |         |                 |      |     |         |                 |     |     |          |                 |
| No ACA                                | 258  | 1.0 |         |                 | 233  | 1.0 |         |                 | 263 | 1.0 |          |                 |
| Structural                            | 52   | 1.4 | 0.9-2.2 | 0.09            | 47   | 1.5 | 1.0-2.5 | 0.08            | 52  | 1.5 | 0.9-2.6  | 0.15            |
| Numerical                             | 107  | 1.0 | 0.7-1.4 | 0.88            | 96   | 0.8 | 0.5-1.3 | 0.37            | 107 | 1.3 | 0.8-2.0  | 0.29            |
| Both                                  | 76   | 1.5 | 1.0-2.1 | <b>0.03</b>     | 64   | 1.5 | 1.0-2.3 | 0.06            | 76  | 2.1 | 1.4-3.2  | <b>&lt;0.01</b> |
| Recurring ACAs <sup>†</sup>           |      |     |         |                 |      |     |         |                 |     |     |          |                 |
| Trisomy 1                             | 9    | 2.7 | 1.3-5.8 | <b>0.01</b>     | 6    | 2.9 | 1.1-7.9 | <b>0.03</b>     | 9   | 4.8 | 2.2-10.5 | <b>&lt;0.01</b> |
| Trisomy 3                             | 10   | 2.0 | 0.9-4.3 | 0.08            | 6    | 1.5 | 0.5-4.6 | 0.51            | 10  | 1.8 | 0.7-4.4  | 0.22            |
| Trisomy 6                             | 27   | 2.2 | 1.3-3.6 | <b>&lt;0.01</b> | 19   | 2.2 | 1.2-3.9 | <b>0.01</b>     | 27  | 2.4 | 1.4-4.2  | <b>&lt;0.01</b> |
| Trisomy 8                             | 114  | 0.6 | 0.4-0.9 | <b>&lt;0.01</b> | 102  | 0.7 | 0.5-1.0 | 0.08            | 114 | 0.6 | 0.4-0.9  | <b>0.02</b>     |
| Trisomy 9                             | 9    | 1.1 | 0.5-2.8 | 0.80            | 9    | 1.8 | 0.7-4.3 | 0.21            | 9   | 0.9 | 0.3-2.7  | 0.79            |
| Trisomy 18                            | 9    | 1.4 | 0.6-3.4 | 0.47            | 8    | 1.9 | 0.7-5.2 | 0.20            | 9   | 1.5 | 0.5-4.0  | 0.46            |
| Trisomy 19                            | 42   | 1.6 | 1.0-2.4 | <b>0.04</b>     | 35   | 1.8 | 1.1-2.9 | <b>0.02</b>     | 42  | 1.8 | 1.1-2.9  | <b>0.03</b>     |
| Trisomy 20                            | 12   | 1.8 | 0.9-3.6 | 0.12            | 10   | 2.3 | 1.0-5.2 | <b>0.04</b>     | 12  | 1.4 | 0.5-3.3  | 0.52            |
| Trisomy 21                            | 21   | 1.7 | 1.0-2.9 | 0.08            | 17   | 1.7 | 0.9-3.4 | 0.11            | 21  | 1.7 | 0.9-3.3  | 0.11            |
| Trisomy 22                            | 13   | 1.8 | 0.9-3.5 | 0.10            | 11   | 2.3 | 1.1-5.0 | <b>0.03</b>     | 13  | 1.8 | 0.9-4.0  | 0.12            |
| +der(9p)                              | 16   | 1.2 | 0.6-2.4 | 0.61            | 13   | 1.2 | 0.5-2.7 | 0.71            | 16  | 1.4 | 0.6-2.9  | 0.44            |
| Flow-MRD at EO12                      |      |     |         |                 |      |     |         |                 |     |     |          |                 |
| Negative                              | 198  | 1.0 |         |                 | 191  | 1.0 |         |                 | 198 | 1.0 |          |                 |
| Positive                              | 17   | 2.1 | 1.1-3.9 | <b>0.02</b>     | 12   | 1.4 | 0.6-3.3 | 0.40            | 17  | 2.8 | 1.4-5.7  | <b>&lt;0.01</b> |
| Multivariable analyses including ACAs | pEFS |     |         |                 | pCIR |     |         |                 | pOS |     |          |                 |
|                                       | No.  | HR  | 95% CI  | P               | No.  | HR  | 95% CI  | P               | No. | HR  | 95% CI   | P               |
| WBC count, x10 <sup>9</sup> /L        |      |     |         |                 |      |     |         |                 |     |     |          |                 |
| ≤100                                  | *    | *   |         |                 | NA   | NA  |         |                 | NA  | NA  |          |                 |

|                                                                          |             |           |               |          |             |           |               |          |            |           |               |          |
|--------------------------------------------------------------------------|-------------|-----------|---------------|----------|-------------|-----------|---------------|----------|------------|-----------|---------------|----------|
| >100                                                                     | *           | *         | *             | *        | NA          | NA        | NA            | NA       | NA         | NA        | NA            | NA       |
| FAB-type                                                                 |             |           |               |          |             |           |               |          |            |           |               |          |
| Non-M5                                                                   | 76          | 1.0       |               |          | 65          | 1.0       |               |          | 76         | 1.0       |               |          |
| M5                                                                       | 284         | 0.5       | 0.4-0.7       | <0.01    | 260         | 0.5       | 0.3-0.8       | <0.01    | 289        | 0.4       | 0.3-0.7       | <0.01    |
| Recurring ACAs                                                           | Yes/No      |           |               |          | Yes/No      |           |               |          | Yes/No     |           |               |          |
| Trisomy 1                                                                | *           | *         | *             | *        | *           | *         | *             | *        | 4/361      | 3.7       | 0.9-15.1      | 0.07     |
| Trisomy 3                                                                | *           | *         | *             | *        | NA          | NA        | NA            | NA       | NA         | NA        | NA            | NA       |
| Trisomy 6                                                                | 21/339      | 2.2       | 1.2-4.0       | <0.01    | 17/308      | 2.7       | 1.3-5.3       | <0.01    | 21/344     | 2.3       | 1.2-4.4       | 0.01     |
| Trisomy 8                                                                | 93/267      | 0.7       | 0.4-1.0       | 0.07     | 86/239      | 0.6       | 0.4-1.1       | 0.08     | *          | *         | *             | *        |
| Trisomy 19                                                               | *           | *         | *             | *        | *           | *         | *             | *        | *          | *         | *             | *        |
| Trisomy 20                                                               | NA          | NA        | NA            | NA       | *           | *         | *             | *        | NA         | NA        | NA            | NA       |
| Trisomy 21                                                               | *           | *         | *             | *        | NA          | NA        | NA            | NA       | NA         | NA        | NA            | NA       |
| Trisomy 22                                                               | NA          | NA        | NA            | NA       | *           | *         | *             | *        | NA         | NA        | NA            | NA       |
| <b>Multivariable analyses including the combination FAB-M5/Trisomy 6</b> | <b>pEFS</b> |           |               |          | <b>pCIR</b> |           |               |          | <b>pOS</b> |           |               |          |
|                                                                          | <b>No.</b>  | <b>HR</b> | <b>95% CI</b> | <b>P</b> | <b>No.</b>  | <b>HR</b> | <b>95% CI</b> | <b>P</b> | <b>No.</b> | <b>HR</b> | <b>95% CI</b> | <b>P</b> |
| WBC count, x10 <sup>9</sup> /L                                           |             |           |               |          |             |           |               |          |            |           |               |          |
| ≤100                                                                     | *           | *         |               |          | NA          | NA        |               |          | NA         | NA        |               |          |
| >100                                                                     | *           | *         | *             | *        | NA          | NA        | NA            | NA       | NA         | NA        | NA            | NA       |
| FAB-type – Trisomy 6                                                     |             |           |               |          |             |           |               |          |            |           |               |          |
| FAB-M5/No trisomy 6                                                      | 273         | 1.0       |               |          | 253         | 1.0       |               |          | 278        | 1.0       |               |          |
| FAB-M5/Trisomy 6                                                         | 11          | 3.9       | 1.9-8.2       | <0.01    | 7           | 3.3       | 1.2-9.3       | 0.02     | 11         | 4.3       | 1.9-10.2      | <0.01    |
| Non-FAB-M5/No trisomy 6                                                  | 66          | 2.3       | 1.6-3.3       | <0.01    | 55          | 2.1       | 1.3-3.4       | <0.01    | 66         | 2.8       | 1.8-4.5       | <0.01    |
| Non-FAB-M5/Trisomy 6                                                     | 10          | 3.1       | 1.4-6.9       | <0.01    | 10          | 5.0       | 2.2-11.2      | <0.01    | 10         | 4.1       | 1.7-9.6       | <0.01    |
| Recurring ACAs                                                           | Yes/No      |           |               |          | Yes/No      |           |               |          | Yes/No     |           |               |          |
| Trisomy 1                                                                | *           | *         | *             | *        | *           | *         | *             | *        | 4/361      | 3.7       | 0.9-15.2      | 0.07     |
| Trisomy 3                                                                | *           | *         | *             | *        | NA          | NA        | NA            | NA       | NA         | NA        | NA            | NA       |
| Trisomy 8                                                                | 93/267      | 0.7       | 0.4-1.0       | 0.08     | 86/239      | 0.6       | 0.4-1.1       | 0.09     | *          | *         | *             | *        |
| Trisomy 19                                                               | *           | *         | *             | *        | *           | *         | *             | *        | *          | *         | *             | *        |
| Trisomy 20                                                               | NA          | NA        | NA            | NA       | *           | *         | *             | *        | NA         | NA        | NA            | NA       |
| Trisomy 21                                                               | *           | *         | *             | *        | NA          | NA        | NA            | NA       | NA         | NA        | NA            | NA       |
| Trisomy 22                                                               | NA          | NA        | NA            | NA       | *           | *         | *             | *        | NA         | NA        | NA            | NA       |
| <b>Multivariable analyses including flow-MRD at EO12</b>                 | <b>pEFS</b> |           |               |          | <b>pCIR</b> |           |               |          | <b>pOS</b> |           |               |          |
|                                                                          | <b>No.</b>  | <b>HR</b> | <b>95% CI</b> | <b>P</b> | <b>No.</b>  | <b>HR</b> | <b>95% CI</b> | <b>P</b> | <b>No.</b> | <b>HR</b> | <b>95% CI</b> | <b>P</b> |
| WBC count, x10 <sup>9</sup> /L                                           |             |           |               |          |             |           |               |          |            |           |               |          |
| ≤100                                                                     | 100         | 1.0       |               |          | NA          | NA        |               |          | NA         | NA        |               |          |
| >100                                                                     | 25          | 0.5       | 0.2-1.1       | 0.07     | NA          | NA        | NA            | NA       | NA         | NA        | NA            | NA       |
| FAB-type                                                                 |             |           |               |          |             |           |               |          |            |           |               |          |
| Non-M5                                                                   | 33          | 1.0       |               |          | 65          | 1.0       |               |          | 34         | 1.0       |               |          |
| M5                                                                       | 92          | 0.5       | 0.3-0.9       | 0.02     | 260         | 0.5       | 0.3-0.8       | <0.01    | 95         | 0.5       | 0.2-1.1       | 0.07     |
| Flow-MRD at EO12                                                         |             |           |               |          |             |           |               |          |            |           |               |          |
| Negative                                                                 | 112         | 1.0       |               |          | NA          | NA        |               |          | 115        | 1.0       |               |          |
| Positive                                                                 | 13          | 2.4       | 1.1-5.5       | 0.04     | NA          | NA        | NA            | NA       | 14         | 2.5       | 1.0-6.0       | 0.05     |

Owing to the absence of flow-MRD at EO12 data in 60% of patients with 9p22/*KMT2A::MLL3*, it was not feasible to assess its prognostic significance in both the context of FAB-type and recurring ACAs. Consequently, we proceeded to conduct multivariable Cox regression analyses, considering either FAB-type and recurring ACAs, or FAB-

type and flow-MRD at EO12. Values in bold indicate statistical significance. ACA type was excluded from multivariable analyses as the recurring ACAs and the ACA type variables are related. 9p22/*KMT2A::MLLT3* refers to t(9;11)(p22;q23). Variables with *P*-values < 0.10 in univariable Cox regression analyses entered multivariable Cox regression models. Variables in the multivariable models with *P*-values > 0.15 were omitted from the final multivariable models by stepwise backward elimination. Two-sided *P*-values ≤ 0.05 were considered statistically significant.

ACA, additional cytogenetic aberrations; CI, confidence interval; EO12, end of induction 2; flow-MRD, flow cytometry-based measurable residual disease; FAB, French-American-British; HR, hazard ratio; NA, not applied (not significant variables in univariable Cox regression analyses); No., number of patients; pCIR, probabilities of cumulative incidence of relapse; pEFS, probabilities of event-free survival; pOS, probabilities of overall survival; WBC, white blood cell count.

\*Omitted from the final multivariable model of EFS/CIR/OS due to a *P*-value > 0.15 in stepwise backward elimination.

†Patients with specific ACAs are compared with patients with other ACAs.

**Supplementary Table S9.** Overview of recurrent additional cytogenetic aberrations that were independently associated with survival over time in childhood *KMT2A*-rearranged acute myeloid leukemia

| Recurrent ACAs | Coenen et al. 2011 |                 |            |                 | Van Weelderen et al. 2024 |                   |            |                   |
|----------------|--------------------|-----------------|------------|-----------------|---------------------------|-------------------|------------|-------------------|
|                | 5-year pEFS        |                 | 5-year pOS |                 | 5-year pEFS               |                   | 5-year pOS |                   |
|                | No.                | %               | No.        | %               | No.                       | %                 | No.        | %                 |
| Monosomy 10    | NA                 | NA              | NA         | NA              | 13                        | 15                | 13         | 21 <sup>†</sup>   |
| Trisomy 1      | NA                 | NA              | NA         | NA              | NA                        | NA                | 13         | 14 <sup>†</sup>   |
| Trisomy 4      | NA                 | NA              | NA         | NA              | 23                        | 16                | 23         | 37                |
| Trisomy 6      | NA                 | NA              | NA         | NA              | 61                        | 29 <sup>†</sup>   | 61         | 47 <sup>†</sup>   |
| Trisomy 8      | 130                | 53*             | 130        | 61*             | 198                       | 51                | 200        | 65                |
| Trisomy 12     | NA                 | NA              | NA         | NA              | 14                        | 21                | 14         | 32                |
| Trisomy 16     | NA                 | NA              | NA         | NA              | 12                        | 8 <sup>†</sup>    | NA         | NA                |
| Trisomy 17     | NA                 | NA              | NA         | NA              | 8                         | 13 <sup>‡</sup>   | 8          | 25                |
| Trisomy 19     | 37                 | 17 <sup>†</sup> | 37         | 24 <sup>†</sup> | NA                        | NA                | NA         | NA                |
| Trisomy 21     | 35                 | 19              | 35         | 28              | NA                        | NA                | NA         | NA                |
| Trisomy X      | NA                 | NA              | NA         | NA              | 13                        | 15                | 13         | 39 <sup>†</sup>   |
| Add(12p)       | NA                 | NA              | NA         | NA              | 13                        | 15 <sup>†,‡</sup> | NA         | NA                |
| Del(9q)        | NA                 | NA              | NA         | NA              | 16                        | 15                | 16         | 31 <sup>†,‡</sup> |

This table exclusively includes recurrent additional cytogenetic aberrations that were subjected to multivariable Cox regression analysis in the respective studies. Notably, in the study by Coenen et al. (Blood, 2009), *P*-values were considered significant if  $\leq 0.05$ , while in the present study, *P*-values were considered significant if  $\leq 0.01$ . ACA, additional cytogenetic aberration; NA, not applicable; No. number of patients; pEFS, probability of event-free survival; pOS, probability of overall survival.

\*Independently associated with superior EFS/OS.

<sup>†</sup>Independently associated with inferior EFS/OS.

<sup>‡</sup>For patients with trisomy 17 and add(12p), the 3-year pEFS are shown, and for patients with del(9q), the 3-year pOS is shown because these estimates could not be extrapolated to 5 years.

## Supplementary Figures

**A**

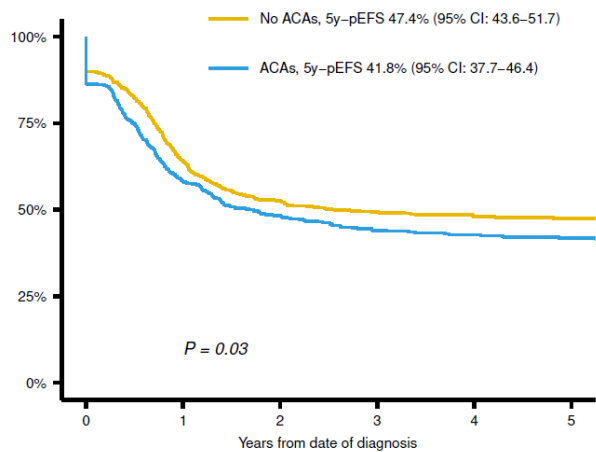

Number at risk (number censored)

|         |         |          |          |           |           |
|---------|---------|----------|----------|-----------|-----------|
| 614 (0) | 391 (3) | 310 (15) | 259 (47) | 200 (100) | 150 (148) |
| 540 (0) | 310 (5) | 232 (31) | 187 (57) | 148 (91)  | 111 (125) |

**B**

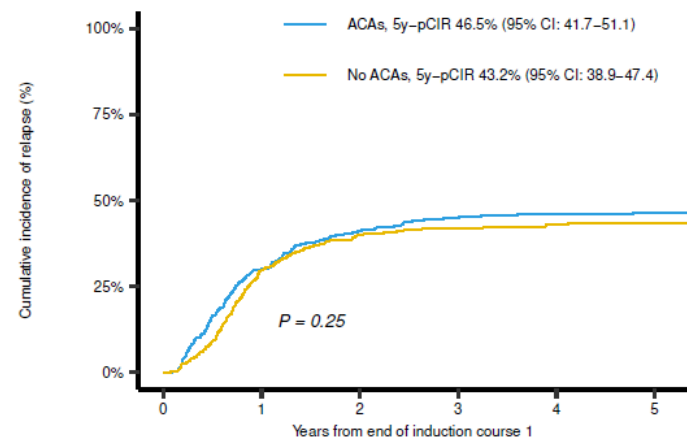

Number at risk (number censored)

|         |          |          |          |           |           |
|---------|----------|----------|----------|-----------|-----------|
| 549 (0) | 372 (15) | 298 (33) | 251 (71) | 192 (127) | 151 (166) |
| 464 (0) | 306 (20) | 226 (50) | 187 (74) | 143 (114) | 108 (148) |

**C**

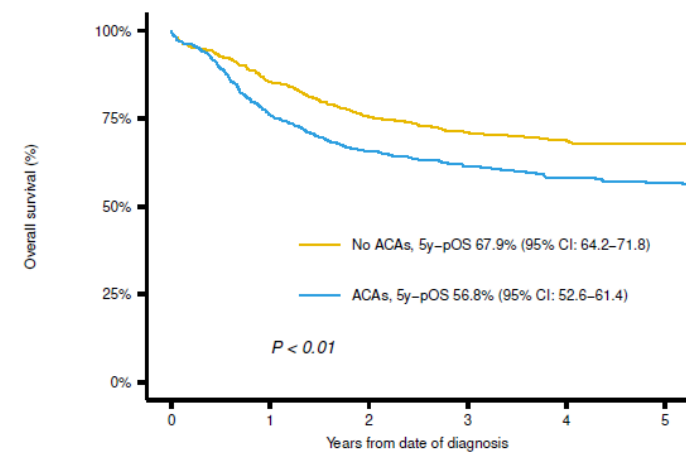

Number at risk (number censored)

|         |         |          |          |           |           |
|---------|---------|----------|----------|-----------|-----------|
| 621 (0) | 528 (4) | 448 (22) | 378 (67) | 292 (142) | 226 (205) |
| 544 (0) | 410 (5) | 325 (35) | 276 (64) | 213 (114) | 159 (163) |

**Supplementary Figure S1. Kaplan-Meier estimates of (A) event-free survival, (B) cumulative incidence of relapse, and (C) overall survival of children with *KMT2A*-rearranged acute myeloid leukemia with and without additional cytogenetic aberrations.** ACA, additional cytogenetic aberration; pCIR, probability of cumulative incidence of relapse; pEFS, probability of event-free survival; pOS, probability of overall survival.

**A**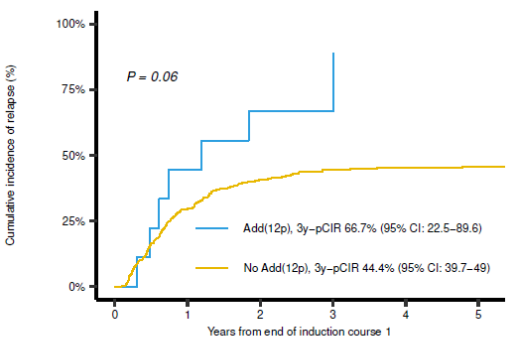

Number at risk (number censored)

|         |          |          |          |           |           |
|---------|----------|----------|----------|-----------|-----------|
| 455 (0) | 302 (19) | 224 (49) | 186 (72) | 143 (112) | 108 (146) |
| 9 (0)   | 4 (1)    | 2 (1)    | 1 (2)    | 0 (2)     | 0 (2)     |

**B**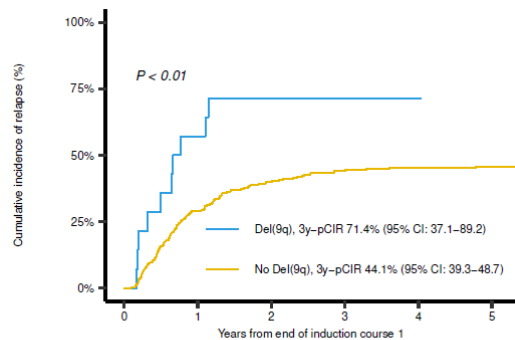

Number at risk (number censored)

|         |          |          |          |           |           |
|---------|----------|----------|----------|-----------|-----------|
| 450 (0) | 301 (19) | 223 (49) | 185 (72) | 142 (111) | 108 (144) |
| 14 (0)  | 5 (1)    | 3 (1)    | 2 (2)    | 1 (3)     | 0 (4)     |

**C**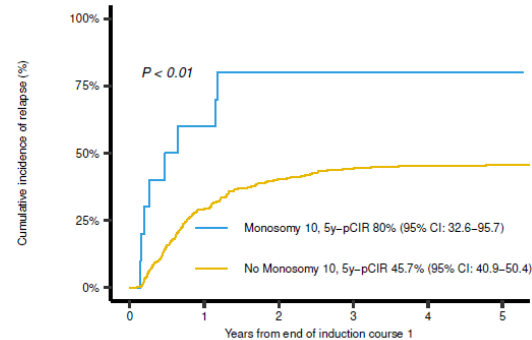

Number at risk (number censored)

|         |          |          |          |           |           |
|---------|----------|----------|----------|-----------|-----------|
| 454 (0) | 302 (20) | 224 (50) | 185 (74) | 141 (114) | 107 (147) |
| 10 (0)  | 4 (0)    | 2 (0)    | 2 (0)    | 2 (0)     | 1 (1)     |

**D**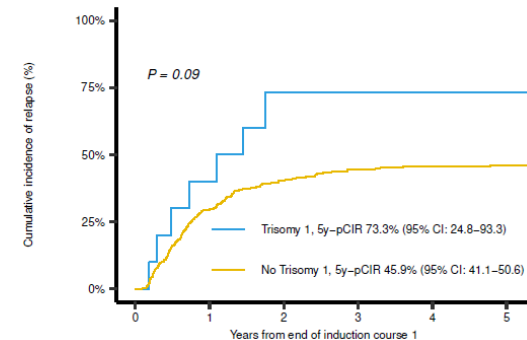

Number at risk (number censored)

|         |          |          |          |           |           |
|---------|----------|----------|----------|-----------|-----------|
| 454 (0) | 300 (20) | 224 (49) | 185 (73) | 142 (112) | 107 (146) |
| 10 (0)  | 6 (0)    | 2 (1)    | 2 (1)    | 1 (2)     | 1 (2)     |

**E**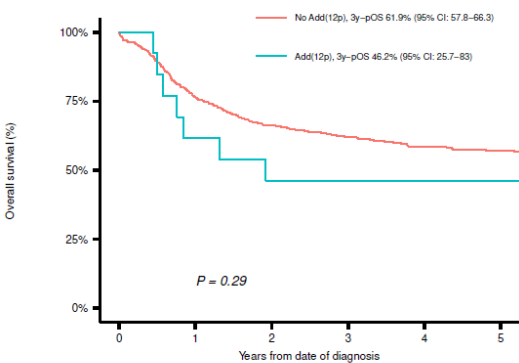

Number at risk (number censored)

|         |         |          |          |           |           |
|---------|---------|----------|----------|-----------|-----------|
| 531 (0) | 402 (5) | 319 (35) | 271 (63) | 209 (112) | 158 (158) |
| 13 (0)  | 8 (0)   | 6 (0)    | 5 (1)    | 4 (2)     | 1 (5)     |

**F**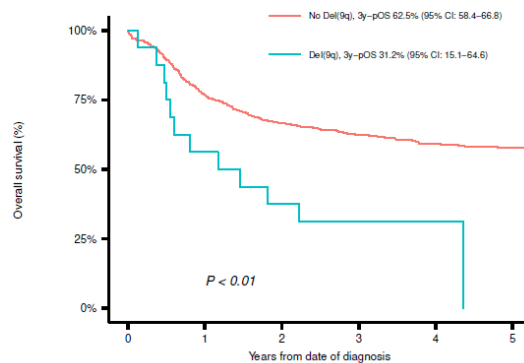

Number at risk (number censored)

|         |         |          |          |           |           |
|---------|---------|----------|----------|-----------|-----------|
| 528 (0) | 401 (5) | 319 (35) | 272 (63) | 210 (112) | 159 (159) |
| 16 (0)  | 9 (0)   | 6 (0)    | 4 (1)    | 3 (2)     | 0 (4)     |

**G**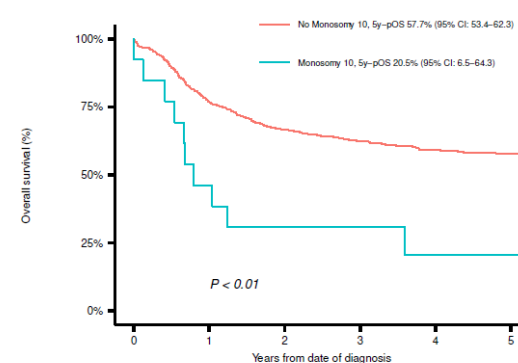

Number at risk (number censored)

|         |         |          |          |           |           |
|---------|---------|----------|----------|-----------|-----------|
| 531 (0) | 404 (5) | 321 (35) | 272 (64) | 211 (113) | 158 (161) |
| 13 (0)  | 6 (0)   | 4 (0)    | 4 (0)    | 2 (1)     | 1 (2)     |

**H**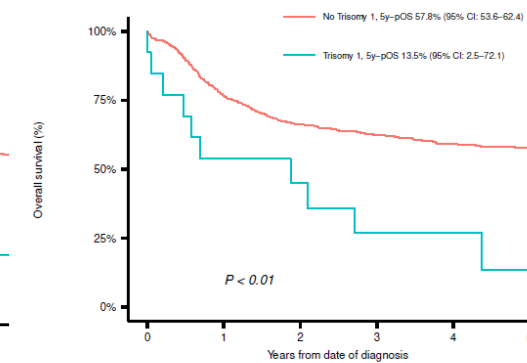

Number at risk (number censored)

|         |         |          |          |           |           |
|---------|---------|----------|----------|-----------|-----------|
| 531 (0) | 403 (5) | 320 (34) | 273 (63) | 210 (113) | 158 (161) |
| 13 (0)  | 7 (0)   | 5 (1)    | 3 (1)    | 3 (1)     | 1 (2)     |

**I**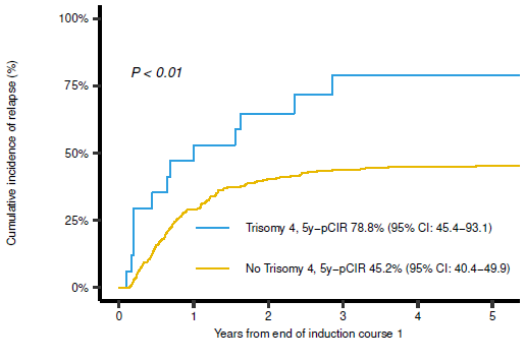

Number at risk (number censored)

|         |          |          |          |           |           |
|---------|----------|----------|----------|-----------|-----------|
| 447 (0) | 298 (20) | 221 (49) | 184 (73) | 140 (113) | 107 (145) |
| 17 (0)  | 8 (0)    | 5 (1)    | 3 (1)    | 3 (1)     | 1 (3)     |

**J**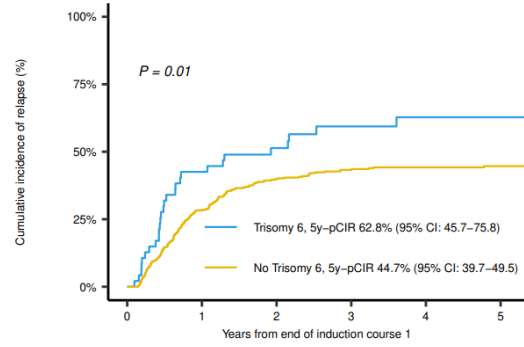

Number at risk (number censored)

|         |          |          |          |           |           |
|---------|----------|----------|----------|-----------|-----------|
| 417 (0) | 279 (20) | 206 (47) | 173 (68) | 133 (105) | 101 (136) |
| 47 (0)  | 27 (0)   | 20 (3)   | 14 (6)   | 10 (9)    | 7 (12)    |

**K**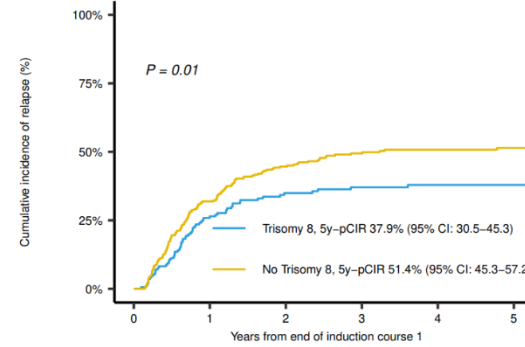

Number at risk (number censored)

|         |          |          |          |         |         |
|---------|----------|----------|----------|---------|---------|
| 292 (0) | 186 (13) | 133 (30) | 108 (43) | 84 (64) | 59 (88) |
| 172 (0) | 120 (7)  | 93 (20)  | 79 (31)  | 59 (50) | 49 (60) |

**L**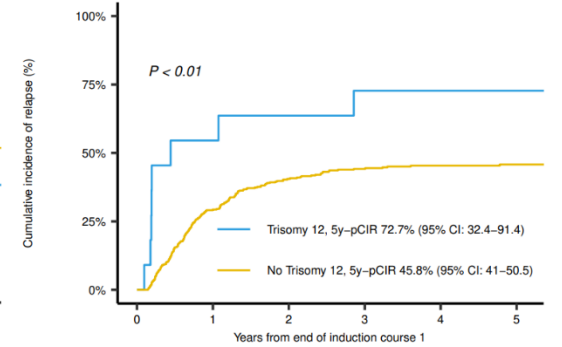

Number at risk (number censored)

|         |          |          |          |           |           |
|---------|----------|----------|----------|-----------|-----------|
| 453 (0) | 301 (20) | 222 (50) | 184 (74) | 142 (112) | 107 (146) |
| 11 (0)  | 5 (0)    | 4 (0)    | 3 (0)    | 1 (2)     | 1 (2)     |

**M**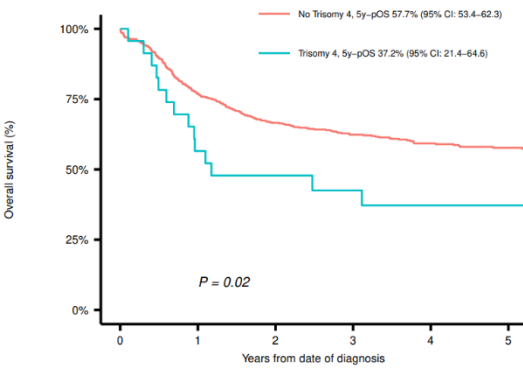

Number at risk (number censored)

|         |         |          |          |           |           |
|---------|---------|----------|----------|-----------|-----------|
| 521 (0) | 397 (5) | 315 (34) | 268 (62) | 208 (110) | 156 (157) |
| 23 (0)  | 13 (0)  | 10 (1)   | 8 (2)    | 5 (4)     | 3 (6)     |

**N**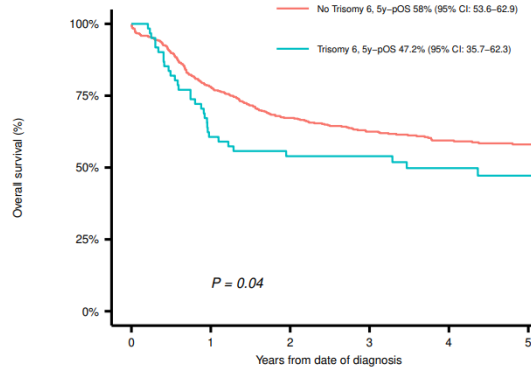

Number at risk (number censored)

|         |         |          |          |           |           |
|---------|---------|----------|----------|-----------|-----------|
| 483 (0) | 373 (5) | 295 (32) | 249 (58) | 191 (105) | 145 (147) |
| 61 (0)  | 37 (0)  | 30 (3)   | 27 (6)   | 22 (9)    | 14 (16)   |

**O**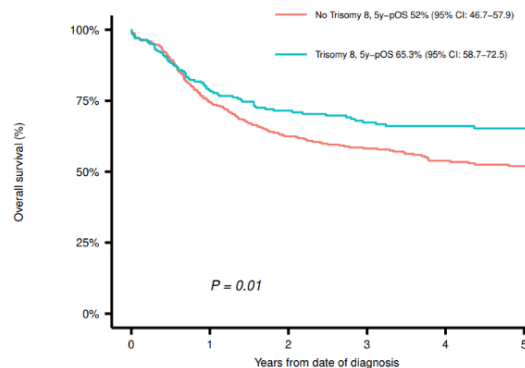

Number at risk (number censored)

|         |         |          |          |          |         |
|---------|---------|----------|----------|----------|---------|
| 344 (0) | 255 (2) | 196 (20) | 167 (36) | 126 (66) | 93 (95) |
| 200 (0) | 155 (3) | 129 (15) | 109 (28) | 87 (48)  | 66 (68) |

**P**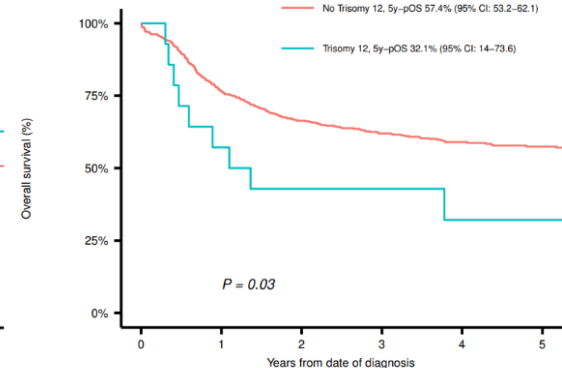

Number at risk (number censored)

|         |         |          |          |           |           |
|---------|---------|----------|----------|-----------|-----------|
| 530 (0) | 402 (5) | 319 (35) | 270 (64) | 211 (111) | 157 (160) |
| 14 (0)  | 8 (0)   | 6 (0)    | 6 (0)    | 2 (3)     | 2 (3)     |

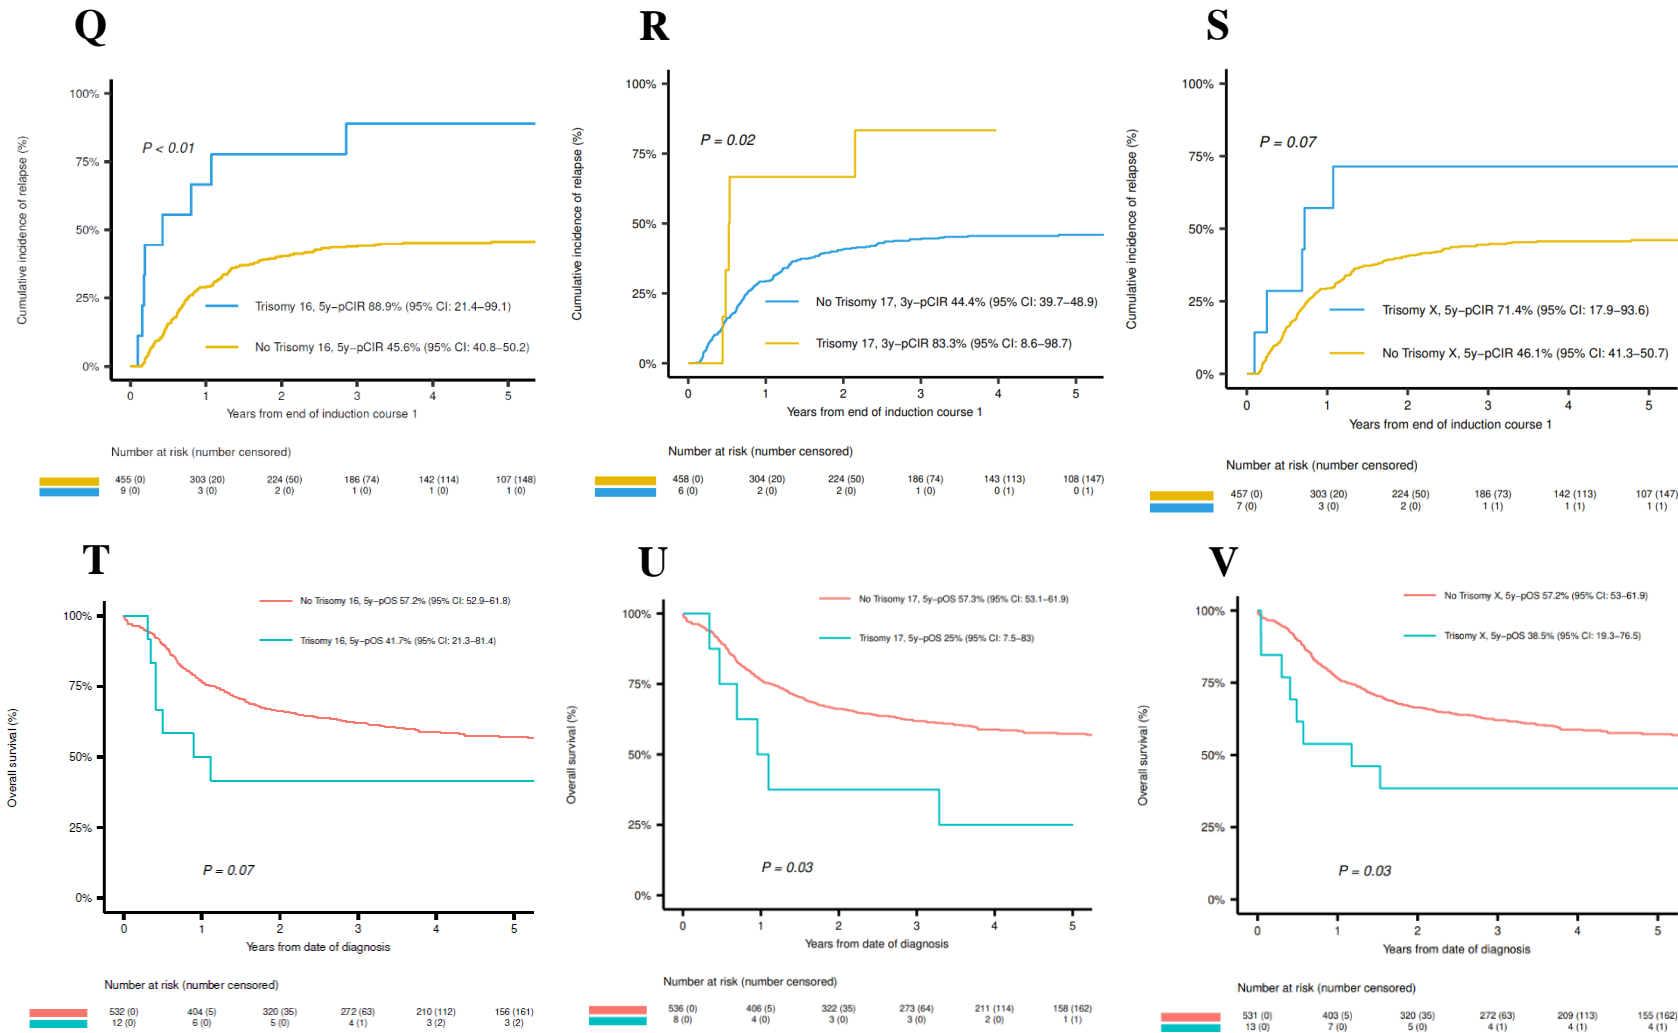

**Supplementary Figure S2. Kaplan-Meier estimates of (A/B/C/D/I/J/K/L/Q/R/S) cumulative incidence of relapse and (E/F/G/H/M/N/O/P/T/U/V) overall survival of children with *KMT2A*-rearranged acute myeloid leukemia and with and without (A, E) add(12p), (B, F) del(9q), (C, G) monosomy 10, (D, H) trisomy 1, (I, M) trisomy 4, (J, N) trisomy 6, (K, O) trisomy 8, (L, P) trisomy 12, (Q, T) trisomy 16, (R, U) trisomy 17, and (S, V) trisomy X. Patients with a specific ACA are compared with patients with other ACAs. CI, confidence interval; pCIR, probability of cumulative incidence of relapse; pOS, probability of overall survival.**
